1                                   **Programmed Variations of Cytokinesis Contribute to**  
2                                                           **Morphogenesis in the *C. elegans* embryo**

3  
4 Xiaofei Bai<sup>1</sup>, Po-Yi Lee<sup>3</sup>, Chin-Yi Chen<sup>3</sup>, James R. Simmons<sup>1</sup>, Benjamin  
5 Nebenfuehr<sup>1,4</sup>, Diana Mitchell<sup>1,5</sup>, Lindsey R. Klebanow<sup>1,6</sup>, Nicholas Mattson<sup>1,7</sup>,  
6 Christopher G. Sorensen Turpin<sup>1</sup>, Bi-Chang Chen<sup>2,3</sup>, Eric Betzig<sup>2</sup>, Joshua N.  
7 Bembenek<sup>1\*</sup>

8  
9 <sup>1</sup>Department of Biochemistry, Cellular and Molecular Biology, University of  
10 Tennessee, Knoxville, Tennessee, United States of America.

11 <sup>2</sup>Janelia Research Campus, HHMI, Ashburn, Virginia, United States of America.

12 <sup>3</sup>Research Center for Applied Science, Academia Sinica, Taiwan.

13 <sup>4</sup>Current Address: NIDDK, NIH, Bethesda, MD, United States of America.

14 <sup>5</sup>Current Address: Biological Sciences, University of Idaho, Moscow, Idaho, United  
15 States of America.

16 <sup>6</sup>Current Address: Parker Hannefin Corporation, Macedonia, Ohio, United States of  
17 America

18 <sup>7</sup>Current Address: USFDA/CDER/OPQ/OBP/DBRRI, Silver Springs, MD, United  
19 States of America

20

21

22 \* Corresponding Author:

23 Joshua N. Bembenek

24 1414 Cumberland Ave.

25 C211 Walters Life Sciences Building

26 Knoxville, TN 37996

27 (865)-974-4085

28 E-mail: bembenek@utk.edu

29 **Abstract**

30 While cytokinesis has been intensely studied, how it is executed during  
31 development is not well understood, despite a long-standing appreciation that various  
32 aspects of cytokinesis vary across cell and tissue types. To address this, we  
33 investigated cytokinesis during the invariant lineage of the *C. elegans* embryo and  
34 find that several parameters are reproducibly altered in different stages. During early  
35 divisions, cells undergo consistent patterns of furrow ingression asymmetry and  
36 midbody inheritance, suggesting specific regulation of these events. During  
37 morphogenesis, in the intestine, pharynx, and amphid sensilla, we find several  
38 alterations including migration of midbodies to the apical surface during cellular  
39 polarization. In each tissue, Aurora B kinase localizes to the apical membrane after  
40 internalization of other midbody components. Perturbations of cytokinesis disrupt  
41 lumen formation and dendrite formation. Therefore, cytokinesis shows surprising  
42 diversity during development, and may regulate the final interphase architecture of a  
43 terminally dividing cell during morphogenesis.

44

## 45 **Introduction**

46           Generation of a multicellular organism requires that carefully orchestrated cell  
47 division is integrated properly into different developmental processes. Cell division is  
48 required not only to generate new cells that organize into tissues, but also to dictate  
49 the size, position and timing of daughter cells that are generated. Several aspects of  
50 cell division, including spindle orientation and division symmetry are well known  
51 instruments of developmental programs (Siller and Doe, 2009). Roles for cytokinesis  
52 in regulating developmental events are emerging, but are much less understood (Chen  
53 et al., 2013; Herszterg et al., 2014; Li, 2007). Using advanced live imaging, we sought  
54 to investigate cytokinesis in the well-defined divisions of the invariant *C. elegans*  
55 embryo lineage, which has been completely described (Sulston et al., 1983).

56           Cytokinesis is the final step of cell division and is normally a constitutive  
57 process during the exit from mitosis defined by discrete steps that occur during “C  
58 phase” (Canman et al., 2000; Oegema and Hyman, 2006). During cell division,  
59 signals from the anaphase spindle initiate ingression of the cleavage furrow  
60 (Bringmann and Hyman, 2005; Eggert et al., 2006), which constricts the plasma  
61 membrane onto the spindle midzone and leads to formation of the midbody. The  
62 midbody is a membrane channel between daughter cells containing microtubules and  
63 a defined organization of more than one hundred proteins that collaborate to execute  
64 abscission, the final separation of daughter cells (Green et al., 2012; Hu et al., 2012;  
65 Skop et al., 2004). Many of the proteins that contribute to midbody formation and  
66 function have roles in the formation of the central spindle and the contractile ring (El  
67 Amine et al., 2013). In addition, vesicles are delivered to the midbody that contribute  
68 lipids as well as regulators of abscission (Schiel et al., 2013). Subsequently, the  
69 ESCRT machinery assembles, microtubules are cleared and membrane scission  
70 occurs (Guizetti et al., 2011; Schiel et al., 2011). Aurora B kinase (AIR-2 in *C.*  
71 *elegans*) is required for the completion of cytokinesis, and also regulates the timing of  
72 abscission in response to developmental or cell cycle cues partly by regulating the  
73 ESCRT machinery (Carlton et al., 2012; Carmena et al., 2015; Mathieu et al., 2013;  
74 Norden et al., 2006; Steigemann et al., 2009). Substantial effort has been devoted to  
75 understanding factors required to assemble the midbody and the mechanisms of  
76 regulation and execution of abscission. In general, while mechanistic details are being  
77 elucidated, it is generally assumed that these events occur through a standard, well-  
78 defined series of ordered events.

79 Exceptions to such a clear linear view of cytokinetic events have long been  
80 known, but are considered to be specialized cases. The most extreme examples are  
81 cells that do not complete cytokinesis altogether and become polyploid, such as liver  
82 or intestinal cells (Amini et al., 2015; Fox and Duronio, 2013; Hedgecock and White,  
83 1985; Lacroix and Maddox, 2012). Another well-known example is found in several  
84 systems where germ cells do not complete abscission and remain connected through  
85 ring canals, which can allow flow of cytoplasm into germ cells (Greenbaum et al.,  
86 2007; Haglund et al., 2011; Hime et al., 1996; Maddox et al., 2005). Delayed  
87 abscission has also been observed in other cell types to keep daughter cells connected  
88 (McLean and Cooley, 2013; Zenker et al., 2017). Other variations of cytokinesis  
89 include cleavage furrow re-positioning during anaphase to change the size and fate of  
90 daughter cells (Ou et al., 2010). The symmetry of furrow ingression is important in  
91 established epithelial tissue where the furrow constricts toward the apical side of the  
92 cell and must occur while appropriate cellular contacts are preserved (Herszterg et al.,  
93 2014). In zebrafish neuroepithelial divisions, asymmetrical furrowing positions the  
94 midbody at the apical domain, which is inherited by the differentiating daughter  
95 (Paolini et al., 2015). Therefore, there are a number of ways the standard pattern of  
96 cytokinesis can be altered and more investigation is required to understand the  
97 functional purpose of these changes and how they are achieved.

98 Recent studies of abscission have sparked renewed interest in the midbody,  
99 which has led to insights into other functions it has beyond abscission (Chen et al.,  
100 2013). In general, the midbody is cut off from each of the daughter cells that give rise  
101 to it (Crowell et al., 2014; Konig et al., 2017). The midbody may then be engulfed by  
102 either cell or persist extracellularly, which can depend on cell type (Ettinger et al.,  
103 2011; Salzmänn et al., 2014). The midbody can also travel to non-parent cells,  
104 suggesting that it may carry or transport signals between cells (Crowell et al., 2014).  
105 The midbody is reproducibly inherited in *Drosophila* germline stem cells, but does  
106 not always end up in the stem cell (Salzmänn et al., 2014). In dividing neuroepithelial  
107 cells, a stem cell marker is concentrated at the midbody and released into the lumen of  
108 the neural tube, which might provide signals during neuronal development (Dubreuil  
109 et al., 2007). This has led to the hypothesis that the midbody provides cues that  
110 regulate cell fate, although a detailed mechanistic understanding of this has not been  
111 elucidated.

112 A more clearly defined function for the midbody has been uncovered in cells  
113 that undergo polarization events after the completion of cytokinesis. For example,  
114 Madin-Darby canine kidney (MDCK) cells can establish apical basal polarity and  
115 organize into a simple epithelial lumen structure (Reinsch and Karsenti, 1994). Apical  
116 membrane markers are first delivered to the midbody during cytokinesis, establishing  
117 an apical membrane at the interface between the first two daughter cells (Schluter et  
118 al., 2009). Proper abscission and midbody positioning is required, in addition to  
119 proper spindle orientation, for MDCK lumen formation (Lujan et al., 2016; Reinsch  
120 and Karsenti, 1994). Polarized trafficking during cytokinesis has been shown to  
121 promote lumen formation in other systems as well (Wang et al., 2014b). Abscission is  
122 also delayed in acentrosomal blastomeres of the early mouse embryo to generate a  
123 midzone-derived microtubule organizing center that directs delivery of apical  
124 membrane markers to the plasma membrane (Zenker et al., 2017). The midbody  
125 becomes the apical process in chick neuronal progenitors (Wilcock et al., 2007) and  
126 defines the site of polarization for dendrite extension in *D. melanogaster* neurons  
127 (Pollarolo et al., 2011). The midbody is also a polarizing cue in the *C. elegans* embryo  
128 during the establishment of dorsoventral axis formation (Singh and Pohl, 2014;  
129 Waddle et al., 1994). In addition, the midbody can play a role in cilium formation  
130 (Bernabe-Rubio et al., 2016). Further effort is required to understand how cytokinesis  
131 and the midbody regulate pattern formation in tissues.

132 In order to further investigate patterns of cytokinesis during development, we  
133 examined the invariant *C. elegans* lineage. We find that cytokinesis follows a lineage  
134 specific pattern and that furrow symmetry and midbody inheritance is highly  
135 reproducible. During morphogenesis, we observe striking midbody migration events  
136 in the developing digestive and sensory tissues in *C. elegans*, likely before abscission.  
137 Interestingly, AIR-2 migrates with midbodies and remains at several apical surfaces  
138 after internalization of different ring components. Coordinated movements of  
139 midbodies and differential fates of midbody components are novel behaviors during  
140 cytokinesis and are programmed at specific divisions in the embryo. Inactivation of  
141 temperature-sensitive midbody proteins disrupt proper formation of several tissues,  
142 indicating an important role for specialized cytokinesis during morphogenesis.  
143 Together, our results reveal that coordinated alterations in cytokinesis regulation,  
144 particularly with regards to the midbody, are critical for proper animal development.

## 145 **Results**

### 146 **Cytokinesis in the first two mitotic divisions: asymmetric midbody inheritance**

147 We sought to systematically examine cytokinesis using lattice light sheet and  
148 spinning disc confocal microscopy during the stereotypical divisions of the *C. elegans*  
149 embryo, which has been extensively studied primarily in the first cell division due to  
150 its size and ease of access. The first division of the P0 cell generates the larger  
151 anterior daughter AB and the posterior daughter P1 (Fig. 1 A). We observed different  
152 components that allow us to evaluate specific aspects of the cytokinetic apparatus  
153 including the central spindle, the cytokinetic furrow and the midbody. We also chose  
154 midbody markers that localize to the flank and ring sub-structures of the midbody  
155 (Green et al., 2012). To observe the midbody flank region, we imaged the Aurora B  
156 kinase, AIR-2, microtubules, and the membrane trafficking regulator RAB-11 (Fig. 1,  
157 3, and Video S1). We also imaged midbody ring markers including the non-muscle  
158 myosin NMY-2 and the centralspindlin component ZEN-4 (Fig. 1 G-P and Video S1).  
159 While the first mitotic furrow shows some variable asymmetry as previously  
160 demonstrated (Maddox et al., 2007), the midbody forms in a relatively central  
161 position between daughter cells (Fig. 1 B-C, G-H and L-M). AIR-2::GFP, endogenous  
162 AIR-2 staining and tubulin show the expected pattern of localization on the central  
163 spindle and midbody as expected (Fig. 1 B-C, Fig. S1 A-D, Fig. 3 A-B and Video  
164 S1). The midbody from the first mitotic division is always inherited by the P1  
165 daughter cell (Fig. 1 A) (Bembenek et al., 2013; Singh and Pohl, 2014). The midbody  
166 microtubule signal diminishes within 8 minutes after furrowing onset, which is a  
167 general indicator of abscission timing (Fig. 3 B, I) (Green et al., 2013; Konig et al.,  
168 2017). AIR-2 is lost from the flank over time but can be observed on the midbody  
169 remnant even after it is internalized into P1 (Fig. 1 D-E and Video S1). Additionally,  
170 each of the ring components behaves similarly to AIR-2, as expected (Fig. 1 I-J and  
171 N-O). Therefore, AIR-2 and other ring components remain co-localized on the  
172 midbody throughout the final stages of cytokinesis and are reproducibly internalized  
173 by the P1 daughter cell, as previously observed (Bembenek et al., 2013; Ou et al.,  
174 2014; Singh and Pohl, 2014).

175 During the second round of division, we observed substantial, reproducible  
176 changes in the pattern of cytokinesis, beginning with furrow symmetry. During the  
177 AB daughter cell division, which gives rise to ABa and ABp, the furrow ingressed

178 from the outer surface until it reached the opposite plasma membrane in contact with  
179 EMS (Fig. 1 D-E, I-J, N-O). We calculated a symmetry parameter using the ratio of  
180 furrow ingression distance from each side of the furrow at completion (Maddox et al.,  
181 2007). On average, the furrow symmetry parameter is 1.7 in the first division, while  
182 the AB furrow is 21.6 and the P1 furrow is 16.1, indicating highly asymmetric  
183 furrows in the second divisions (Fig. 1 V, X). The central spindle is swept from the  
184 middle of the AB cell into contact with EMS during furrow ingression (Fig. 1 E,  
185 Video S1). AIR-2 localizes to the central spindle, then the midbody flank and remains  
186 associated with the midbody remnant after it is engulfed (Fig. 1 D-F, S-U and Video  
187 S1). NMY-2 and ZEN-4 also follow the expected pattern during cytokinesis and  
188 appear on the midbody that forms in contact with EMS (Fig. 1 I-J, N-O and Video  
189 S1). RAB-11::GFP in both the first and second rounds of division accumulates briefly  
190 prior to abscission and is not observed on the midbody afterward (Figure 1 Q-U), as  
191 shown previously (Ai et al., 2009; Bai and Bembenek, 2017; Bembenek et al., 2010).  
192 Therefore, all midbody markers examined behave as expected, localizing to the  
193 midbody, which is internalized after abscission is completed.

194 Our examinations of the midbody confirmed the unexpected and consistent  
195 pattern of inheritance during the AB division. The midbody from the AB cell division  
196 that forms in contact with EMS after highly asymmetric furrowing is invariably  
197 engulfed by EMS instead of either of the AB daughter cells (Fig. 1 F, K, P, U, Fig S1  
198 D and Video S1). Further, the midbody from the P0 division is also always inherited  
199 by EMS. Microtubules in the midbody flank disappear within 8 minutes after  
200 furrowing in both AB and P1 cell divisions, indicative of relatively fast abscission at  
201 this stage (Fig. 3 C-D and I). Therefore, a consistent pattern of cytokinesis is observed  
202 during the first two divisions, involving reproducible furrow ingression symmetry and  
203 midbody inheritance. Multiple mechanisms operating during cytokinesis must be  
204 properly regulated in order to achieve this highly reproducible pattern. This analysis  
205 confirms expected patterns of midbody regulation and midbody protein dynamics  
206 during the early embryonic divisions and indicates careful regulation of cytokinesis.

207

### 208 **Cytokinesis in the intestine epithelia: midbody migration to the apical surface**

209 We next performed a similar analysis of cytokinesis on three developing tissues  
210 during morphogenesis, which revealed novel cytokinesis patterns in each. During  
211 embryonic morphogenesis, cells undergo terminal divisions and start to form tissues

212 by polarizing and changing shape. The intestine is a well-studied epithelial tube  
213 derived from the E blastomere that undergoes five well defined divisions (Leung et  
214 al., 1999). The E8 to E16 division occurs around 280 minutes after the first cleavage,  
215 after which cells undergo a mesenchyme to epithelial transition involving epithelial  
216 polarization and subsequently organize into a tube (Leung et al., 1999). Our  
217 observations demonstrate that these cells are performing cytokinesis as they undergo  
218 polarization, which to our knowledge has not been previously reported (Fig. 2 A). The  
219 E8 cells undergo relatively symmetrical furrowing that produces a centrally placed  
220 midbody (Fig. 2 B, E, I, Fig. S2 A and Video S2-4) with a 1.0 symmetry parameter  
221 (Fig 1 W, X), in contrast with the highly asymmetric furrow and displaced midbody  
222 location during the AB cell division. Therefore, the E8-E16 division appears largely  
223 routine up until the point of midbody formation.

224 After midbody formation, there are several changes to the pattern of cytokinesis,  
225 which occur as the cells polarize. Using lattice light sheet imaging, we observe that  
226 centrally located midbodies from both left and right daughter cell divisions (Ealp,  
227 Earp, Epla and Epra) migrate across the width of the cell to the nascent apical surface  
228 at the midline, which completes 30 minutes after furrow ingression (Fig. 2 B-D and  
229 Video S2). The midbody flank region elongates during the migration process and the  
230 flank microtubules persist for over 25 minutes on average from furrow ingression to  
231 when they join other microtubules at the apical midline and can no longer be  
232 distinguished, which is three times longer than the early divisions (Fig. 3 F, H-I).  
233 AIR-2::GFP localizes along the extended length of the flank microtubules that move  
234 to the apical midline instead of becoming confined to the midbody remnant as  
235 observed in early divisions (Fig. 2 E-H, M, and Video S2-4). The ratio of the length of  
236 this midbody flank relative to the cell at the greatest length is 0.47 (average  $4.6 \mu\text{m}$  /  
237  $9.8 \mu\text{m}$ ) in the intestinal cell division, which is more than twice that of the early two  
238 cell divisions 0.17 (average  $9.3 \mu\text{m}$  /  $53.4 \mu\text{m}$ ) in P0 and 0.17 (average  $7.7 \mu\text{m}$  /  $44.3$   
239  $\mu\text{m}$ ) in AB (Fig. 2 P-Q). The ring markers ZEN-4 and NMY-2 are quickly  
240 internalized ( $553 \pm 140$  seconds and  $545 \pm 179$  seconds, respectively) after the midbody  
241 reaches the apical midline (Fig. 2 I-L, N-O and Video S3). Collectively, these data  
242 indicate that abscission occurs after migration of the midbody to the apical midline.  
243 Therefore, E8 cells undergo a novel programmed apical midbody migration event  
244 instead of having an asymmetrical furrow lead to the formation of an apically



245 localized midbody, as observed in the AB cell division and epithelial cells in other  
246 systems.

247 Next, we noticed that not all midbody components are internalized the end of  
248 cytokinesis and some remain on the apical surface. In contrast to the midbody ring  
249 components, AIR-2 persists at the apical midline well after the time that ring  
250 components are internalized and polarization is complete (Fig. 2 D, G, H, M and  
251 Video S2-4), co-localizing with the apical polarity marker PAR-6 (Fig S2 F-H).  
252 Endogenous AIR-2 can also be observed at the apical midline by immunofluorescence  
253 (Fig. S1 E-G). The gut apical surface recruits pericentriolar material donated by the  
254 centrosome during E16 polarization (Feldman and Priess, 2012; Yang and Feldman,  
255 2015). We observed that  $\gamma$ -tubulin::GFP moves to the apical surface at the same time  
256 as AIR-2::GFP (Fig. S2 I). High temporal resolution single plane confocal imaging to  
257 track individual midbody dynamics confirm the elongated AIR-2::GFP flank  
258 localization and persistence at the apical midline as well as the rapid internalization of  
259 ZEN-4::GFP after the migration event (Fig. 2 M-N and Video S4). Therefore,  
260 different midbody components have different fates after cytokinesis in the E8-E16  
261 intestinal divisions, with ring markers being internalized while AIR-2 remains at the  
262 apical surface. To our knowledge, this is the first report of AIR-2 localization  
263 remaining at the plasma membrane after abscission, in most cases it remains on the  
264 midbody remnant that is internalized as observed in the early embryo as described  
265 above.

266 In other lumen forming systems, such as MDCK cells, RAB-11 vesicle  
267 trafficking during cytokinesis transports apical membrane components to the midbody  
268 to establish the apical membrane (Schluter et al., 2009). In *C. elegans*, RAB-11  
269 endosomes control trafficking at the apical surface of the intestine throughout the life  
270 of the animal (Sato et al., 2014). We imaged RAB-11 during the E8-E16 division to  
271 examine when apical localization occurs. RAB-11::mCherry colocalizes with AIR-  
272 2::GFP once the midbody is formed and migrates to the apical surface with the  
273 midbody (Fig. S2 J-L). RAB-11::mCherry is also localized at spindle poles, as in  
274 other mitotic cells (Albertson et al., 2005), which also migrate to the apical surface  
275 (Feldman and Priess, 2012). Similar to AIR-2, RAB-11 remains localized to the apical  
276 surface and appears to remain at this position throughout the life of the animal (Fig.  
277 S2 L). These observations indicate that the apical localization of RAB-11 is  
278 established during cytokinesis in the E8-E16 division and is delivered at least in part

279 by both the midbody and centrosome. Therefore, cytokinesis is programmed to occur  
280 in a specialized way during the E8-E16 division, which may contribute to formation  
281 of the apical surface during intestinal epithelial polarization.

282 The anterior and posterior pair of E16 cells (Ealaa, Earaa, Eplpp and Eprpp)  
283 undergo one last division to achieve the E20 intestine stage. In the four central E8  
284 cells that do not divide again, the midbody migrates to the midline at E8-E16 as  
285 described above. However, the midbodies from the other four E8 cells (Eala, Earaa,  
286 Eplp and Eprp), which undergo another division, migrate toward the midline but the  
287 AIR-2 signal diminishes (Fig. S2 E). During the terminal E16-E20 divisions, the  
288 midbodies of Ealaa, Earaa, Eplpp and Eprpp undergo apical migration after  
289 symmetrical furrowing (Fig. S2 M-O and Video S5). Therefore, the midbody  
290 migration event in the intestine does not happen only during the polarization event  
291 that occurs during E8-E16, suggesting that it is specifically programmed to occur  
292 during the terminal embryonic divisions. Post-embryonic divisions in the intestine at  
293 L1 lethargus involve nuclear but not cytoplasmic divisions leading to the formation of  
294 binucleate cells that subsequently undergo multiple rounds of endoreduplication to  
295 become highly polyploid (Hedgecock and White, 1985). Therefore, cytokinesis in the  
296 intestinal lineage undergoes distinct regulatory phases at different stages of  
297 development.

298

### 299 **Gut lumen formation is disrupted in cytokinesis mutants**

300 Given the pattern of cytokinesis during the E8-E16 division and the localization  
301 of AIR-2::GFP to apical structures, we sought to investigate whether cytokinesis is  
302 important for lumen formation. First, we assessed whether cytokinesis is essential for  
303 embryo viability during later development since it is possible that embryos could still  
304 hatch even if terminal divisions fail and morphogenesis occurs with multinucleated  
305 cells. To bypass the essential function of cytokinetic regulators during the early  
306 embryonic cell divisions, we inactivated temperature sensitive (ts) mutants after  
307 isolation of two-cell embryos at the permissive temperature (15 °C) and shifted them  
308 to non-permissive temperature (26 °C) at different embryo stages until they hatched.  
309 The *air-2 (or207ts)* embryos have only 53.6% (37/69) hatching even when left at  
310 15 °C through hatching, indicating that this mutant is sick even at permissive  
311 temperature, while wild-type N2, *zen-4 (or153ts)* and *spd-1 (oj5ts)* embryos are 100%  
312 viable when kept at 15 °C (Table 1). Embryos shifted to 26 °C after 4.5 hours at 15 °C

313 (corresponding to late E4 to early E8 stages) showed significantly increased lethality  
314 in both *air-2(or207ts)* and *zen-4 (or153ts)*, but not *spd-1 (oj5ts)* (Table 1), which  
315 correlates with the amount of cytokinesis failure observed. The few animals that were  
316 able to hatch in *air-2(or207ts)* and *zen-4 (or153ts)* mutants had severe morphogenesis  
317 defects (data not shown). Mutant embryos shifted after the completion of all the  
318 developmental divisions at the comma to 1.5-fold stage were largely rescued for  
319 lethality and hatched at a rate similar to permissive temperature (Table 1). Therefore,  
320 these results are consistent with the hypothesis that cytokinesis is essential for the  
321 final stages of embryonic development during morphogenesis.

322 Next, we investigated whether inactivation of cytokinesis mutants late in  
323 development affected gut lumen morphogenesis. We evaluated the formation of the  
324 apical surface of the intestine by staining for the Ezrin-Radixin-Moesin homologue,  
325 ERM-1 (van Furden et al., 2004). The *air-2(or207ts)* mutant fails cytokinesis within  
326 minutes after shifting to non-permissive temperature in one-cell embryos (Severson et  
327 al., 2000), but does not show penetrant cytokinesis failures unless shifted several  
328 hours in older embryos (Figure 4). In comparison, *zen-4 (or153ts)* and *spd-1 (oj5ts)*  
329 have similar rapid inactivation kinetics at all stages tested, with *zen-4 (or153ts)*  
330 causing penetrant cytokinesis defects while *spd-1 (oj5ts)* does not (data not shown).  
331 Therefore, we shifted mutant embryos around the transition between the E4-E8 stages  
332 to 26 °C and fixed at the bean stage after intestinal polarization (Fig. 4 A, methods).  
333 In all cases, ERM-1 was localized to the apical surface of the intestine and pharynx  
334 (Fig. 4 B, Fig. S3 A, D). However, ERM-1 staining was broadened, branched and/or  
335 discontinuous in *air-2 (or207ts)* embryos (Fig. 4 C-E, H). Disrupted ERM-1 staining  
336 was also observed in *air-2 (or207ts)* embryos, which were shifted at E4-E8 for 4.5-5  
337 hours until the comma stage, indicating that these defects are not resolved later in  
338 development (Fig. S3 B, D). Furthermore, the intestine was highly mispositioned  
339 within the embryo as revealed by color-coded max Z-projections (Figure 4 I) and the  
340 nuclei were often randomly positioned on the z-axis compared with wild-type (Fig. 4  
341 B, E-F inserts). The localization of other apical markers, such as PAR-3, DLG-1 and  
342 IFB-2, were similarly disrupted (Fig. S3 E-J, DLG-1 and IFB-2 data not shown). The  
343 *zen-4 (or153ts)* embryos shifted from the E4 stage for 2.5-3 hours until the bean stage  
344 also had highly penetrant branched and discontinuous apical ERM-1 staining that was  
345 mispositioned within the embryo at a lower rate than the *air-2 (or207ts)* mutants (Fig.  
346 4 F, H and Fig. S3 C-D). The *spd-1 (oj5ts)* embryos shifted to 26 °C at E4-E8 until

347 the E16-E20 stage displayed a significant, but lower rate of lumen defects (Fig. 4 G-I)  
348 despite having no lethality (Table 1) and minimal cytokinesis failures. Therefore, we  
349 conclude that proper execution of cytokinesis is required for normal lumen formation  
350 in the gut.

351

### 352 **Cytokinesis in the pharynx: apical midbody migration and AIR-2 accumulation**

353 We also noticed migration of the midbody and accumulation of midbody  
354 proteins at the apical surface during the terminal divisions in the pharynx. Unlike the  
355 intestine, which originates from a single blastomere that undergoes a very well  
356 defined series of divisions, the pharynx has a more complicated structure, containing  
357 more than 80 pharyngeal precursor cells (PPCs) that arise from both AB and MS  
358 founder cells (Sulston et al., 1983). The PPCs organize into a double plate structure  
359 prior to the final division, which occurs at around 310-325 minutes after the first  
360 cleavage, and then polarize and undergo apical constriction to become wedge shaped  
361 cells that form a lumen by 355 minutes (Rasmussen et al., 2013; Rasmussen et al.,  
362 2012). To obtain optimal images of this large, complex structure, we filmed at least a  
363 15-micron Z-depth section of the embryo from both dorsal and ventral aspects with  
364 confocal microscopy (Figure 5, Video S6). We also filmed whole embryos with lattice  
365 light sheet microscopy, which provides higher spatial resolution during the  
366 pharyngeal cell division (Video S7). Similar to our observations in the intestine, PPCs  
367 are in the final stages of cell division as they polarize, which has not been previously  
368 described. PPCs undergo a symmetric furrowing event that yields a centrally placed  
369 midbody between the two daughter cells (Fig. 5 A-C, F, G-H, K, L-M, P and Video  
370 S6). Also similar to the intestine, PPC midbodies migrate from their central position  
371 between daughter cells to the apical midline of the forming pharyngeal bulb (Fig. 5 D,  
372 F, I, K, N, P and Video S6). In PPC terminal divisions, AIR-2::GFP appears as a  
373 midbody flank structure that migrates to the apical midline and persists at the apical  
374 surface after cyst formation (Fig. 5 D, E, F and Video S6). Similar to AIR-2, RAB-11  
375 and tubulin accumulate and remain localized to the apical surface after polarization  
376 (Fig. S4 A-F). We confirmed this localization with staining and show that endogenous  
377 AIR-2 can be observed on the apical surface of the pharynx (Fig. S1 H-J). AIR-2  
378 partially co-localized with PAR-6 at the apical membrane, which also acquires  $\gamma$ -  
379 tubulin::GFP after polarization (Fig. S4 G-L). ZEN-4::GFP appears on midbodies,  
380 migrates to the apical surface, and is rapidly degraded, similar to the intestinal

381 divisions (Fig. 5 J and Video S6). NMY-2::GFP also labels midbodies and moves to  
382 the apical surface, but is recruited to the apical surface during apical constriction (Fig.  
383 5 O, P and Video S6) (Rasmussen et al., 2012). Cytokinesis in the gut and pharynx  
384 show similar patterns where midbodies migrate to the apical midline and specific  
385 midbody components, especially AIR-2, remain localized at the apical cortex even  
386 after the midbody ring is removed. Therefore, similar patterns of apical localization  
387 and midbody migration are observed during epithelial polarization in the intestine and  
388 pharynx in *C. elegans*.

389

### 390 **Dendrites of sensilla neurons: clustering of midbody components**

391 The *C. elegans* amphid sensilla are a sensory organ that contains 12 neurons  
392 with dendrites that extend processes through the cuticle and two sheath cells. During  
393 morphogenesis, amphid neurons bundle together, anchor at the tip of the animal and  
394 migrate back to extend dendrites (Heiman and Shaham, 2009). From the lineage of  
395 the 12 sensilla neurons, there are 10 precursor cell divisions that occur between 280  
396 and 400 minutes after the first cleavage (Sulston et al., 1983). These terminal  
397 divisions include two daughter cell pairs (ADF/AWB and ASG/AWA) and several  
398 where one daughter differentiates into a sensilla neuron while the other daughter  
399 undergoes apoptosis (ADL, ASE, ASK, ASI), or differentiates into another neuron  
400 (AWC, ASH, AFD, ASJ). Our observations show that these cells undergo a unique  
401 form of cytokinesis just before they undergo dendrite morphogenesis (Fig. 6 A).  
402 These cells undergo a symmetrical furrowing event before midbodies form centrally  
403 between the daughter cells (Fig. 6 B and Video S8-9). A group of at least 6 daughter  
404 cell pairs divide initially forming multiple midbodies as observed with both confocal  
405 and lattice light sheet imaging (Fig. 6 C and Video S8-9). These midbodies migrate  
406 together into a cluster over a 60-minute time window (Fig. 6 D). AIR-2::GFP, RAB-  
407 11 and tubulin persist in these clusters (Fig. 6 D, Fig. S5 A-F and Video S8-9), while  
408 ZEN-4::GFP rapidly disappears during the midbody clustering process (Fig. 6 E and  
409 Video S8). Endogenous AIR-2 can be observed in these lateral apical clusters (Fig. S1  
410 K-M). We observe PAR-6 at the tip of the sensilla cluster, indicating that it is the  
411 apical surface of these cells, which accumulates  $\gamma$ -tubulin::GFP similar to the pharynx  
412 and gut (Fig. 6 G, Fig. S5 G-L). In contrast to ZEN-4::GFP, NMY-2::GFP migrates  
413 with the midbody to the cluster and persists at the very tip of the dendrites (Fig. 6 F

414 and Video S8). To our knowledge, this is the first detailed examination of the division  
415 and initial steps of organization of these neuronal cell precursors.

416 After formation of the cluster, we observe this apical region move and extend  
417 anteriorly until it reaches the tip as the animal progresses from the bean stage through  
418 the late comma stage. AIR-2 remains localized along a substantial increasing length  
419 of the dendritic extension during the entire elongation process, as does tubulin (Fig. 6  
420 H-J, Fig. S5 J-K, M-O and Video S10). As the amphid dendrites extend from the  
421 lateral sides of the embryo, other foci of AIR-2 form within the anterior region of the  
422 embryo and migrate toward the tip until six sensilla appear at the anterior tip (Fig. 6 J  
423 inset, and Video S10). Although the individual cell divisions cannot be easily  
424 discerned in this crowded anterior region, these data suggest that the sensilla in the tip  
425 of the animal form through a similar process. These results demonstrate that directly  
426 after cytokinesis a midbody migration event brings several midbody components to  
427 the apical tip of the amphid dendrites, which remain localized there as dendrite  
428 extension occurs. Neuronal cell polarization has been suggested to share mechanisms  
429 with epithelial morphogenesis (McLachlan and Heiman, 2013), suggesting that these  
430 modified cytokinesis events may play a role in cells that undergo epithelial  
431 polarization. Therefore, the midbody migrates from its original position at the end of  
432 furrowing to the apical surface in several developing tissues during morphogenesis.  
433 Interestingly, AIR-2 remains localized at the apical surface of these tissues well after  
434 cytokinesis has occurred.

435

### 436 **Amphid sensilla defects in cytokinesis mutants**

437 Lastly, we investigated whether the developing sensory neurons formed  
438 normally in temperature sensitive cytokinesis mutants. *C. elegans* amphid neurons can  
439 take up lipophilic dyes such as DiI when they form properly and generate cilia that are  
440 exposed to the environment (Hedgecock and White, 1985; Perkins et al., 1986). We  
441 maintained embryos at the permissive temperature (15 °C) and shifted them to the  
442 non-permissive temperature at different embryo stages until they hatched, then we  
443 stained the surviving L1 larvae with DiI. In wild-type, amphid neuron cell bodies,  
444 amphid dendrites, and phasmid neurons were clearly labeled by DiI and appeared  
445 normal as expected (Fig. 7 A). In the *air-2 (or207ts)* mutant, we observed numerous  
446 defects in the subset of surviving embryos that did not fail to hatch and became L1  
447 larvae (Fig. 7 B-E). Animals with no observed DiI staining were more common under

448 longer inactivating conditions (Table 2). All *zen-4 (or153ts)* fail to hatch when shifted  
449 during E4-E8, preventing analysis of DiI staining (Table 2). When shifted from the E8  
450 stage, the few surviving *zen-4 (or153ts)* larvae show severe DiI staining defects,  
451 which was dramatically reduced if embryos were shifted after the final divisions at the  
452 comma-1.5 fold stage (Fig. 7 F, Table 2). The *spd-1 (oj5ts)* animals still had weak  
453 defects revealed by DiI staining despite having minimal cytokinesis failures, but never  
454 showed a complete lack of staining (Fig. 7I, Table 2). These data are consistent with  
455 the hypothesis that proper execution of cytokinesis contributes to proper neurite  
456 development. Therefore, cytokinesis and AIR-2 function especially are required late  
457 in embryo development for proper morphogenesis of the apical lumen of the gut and  
458 proper formation of the sensilla neurons.

459

## 460 **Discussion**

461 Our results have revealed complex and reproducible patterns of cytokinesis  
462 during the invariant embryonic divisions in *C. elegans*. The entire invariant lineage  
463 has been known for several decades and our results suggest that cytokinesis also  
464 follows a specific pattern during the lineage. We observe reproducible alterations to  
465 furrow symmetry, central spindle length, abscission timing, midbody movement and  
466 inheritance. The traditional view of the embryo lineage is that cells are born and  
467 subsequently undergo changes that produce the differentiated organization within a  
468 tissue. However, our data demonstrate that cells in multiple tissues are completing  
469 cytokinesis when they polarize during morphogenesis, which may impact the  
470 regulation of the underlying cellular events. This role for cytokinesis might explain  
471 why many cells, including several of the amphid neuronal precursors, divide and  
472 produce one daughter cell that undergoes apoptosis instead of finishing the divisions  
473 earlier when the right number of cells are generated. A modified cytokinesis in the Q  
474 neuroblast generates a smaller daughter cell that undergoes apoptosis, which is  
475 prevented if the parameters of cytokinesis change (Ou et al., 2010). Given that the  
476 entire cell is reconfigured during mitosis and that cytokinesis is the transition period  
477 back into the interphase state, this is an ideal time window to reorganize cellular  
478 architecture. Understanding how the developmental plasticity of cytokinesis is  
479 regulated will be a fascinating question for future studies.

480 We observe consistent changes to the symmetry of furrow ingression where the  
481 first mitosis is relatively symmetric and the second mitosis is highly asymmetric.  
482 Previously, the furrow asymmetry in the first division was shown to be a consequence  
483 of asymmetric accumulation of contractile ring components during ingression  
484 (Maddox et al., 2007). The adhesion between cells may also reinforce this asymmetry  
485 to drive the highly asymmetric furrow observed in the second round of divisions  
486 (Padmanabhan and Zaidel-Bar, 2017). Whether due to cell intrinsic or extrinsic  
487 factors, the asymmetric furrows have previously been postulated to drive efficient  
488 furrowing or help maintain proper cell-cell contacts during cytokinesis (Maddox et  
489 al., 2007; Morais-de-Sa and Sunkel, 2013). Our data suggest another hypothesis: the  
490 asymmetric furrow may be required for the AB midbody to be engulfed by EMS  
491 instead of either daughter cell. Given that the midbody has been proposed to deliver  
492 signals to cells that inherit it, it is worth noting that the MS cell collects up to four  
493 midbodies over time (Singh and Pohl, 2014). Unexpectedly, we see relatively  
494 symmetric furrowing in several tissues later in morphogenesis. An asymmetric furrow  
495 would be sufficient to position the midbody at the nascent apical surface. Given that  
496 the polarization mechanisms are not completely understood, for example the  
497 extracellular matrix component laminin is required in the pharynx but not the intestine  
498 (Rasmussen et al., 2012), the symmetrical furrow followed by midbody migration  
499 may be important for defining and positioning the apical surface. Perhaps there is no  
500 good reference for an asymmetric furrow to position the midbody at the apical surface  
501 prior to epithelial polarization in cells in different locations. We hypothesize that  
502 lumen formation in the gut and pharynx is analogous to that described in MDCK cells  
503 with the formation of a midbody-derived apical-membrane initiation site with the  
504 addition of midbody migration for correct positioning of this domain (Li et al., 2014).

505 The coordinated, directed movement of the midbody we observe in several  
506 tissues represents a new phenomenon during cytokinesis. Our data also suggest that  
507 abscission has not taken place before the midbody migrates in the intestine. This  
508 would mean that the two daughter cells polarize while connected at the midbody,  
509 which might facilitate their reorganization. These data are somewhat different from  
510 what is observed in already polarized epithelia where the furrow constricts from the  
511 basal to the apical surface to position the midbody. It is tempting to consider that  
512 performing cytokinesis in this particular fashion has an important function in the



513 polarization process. Since these cells are undergoing a mesenchymal to epithelial  
514 transition, it is worth considering whether cytokinesis may have some general  
515 function in executing this process. Previously, midbodies have been shown to  
516 reposition after forming under normal or mutant conditions (Bernabe-Rubio et al.,  
517 2016; Herszterg et al., 2013; Morais-de-Sa and Sunkel, 2013; Singh and Pohl, 2014),  
518 but this phenomena is only appreciated in isolated cases and poorly understood. The  
519 entire cortex is controlled by several actin cytoskeletal regulators in order to perform  
520 cytokinesis (Jordan and Canman, 2012), perhaps this is also employed to control the  
521 movement of the midbody. In the future, it will be important to investigate how the  
522 midbody moves to the apical surface after furrowing is completed.

523         In the tissues we investigated, the cells are undergoing their terminal cell  
524 division before morphogenesis, although some cells like those in the gut undergo  
525 post-embryonic divisions. These cells are also undergoing epithelial polarization and  
526 a mesenchymal to epithelial transition. After midbody movement, RAB-11, AIR-2  
527 and possibly other molecules are recruited to the apical surface. Certainly, these  
528 different tissues have unique gene expression programs, part of which might involve  
529 proteins delivered to the midbody and the apical surface. A transmembrane protein  
530 that binds to an extracellular partner is expressed in the tip of the dendrites in amphid  
531 sensilla, which is required to maintain dendrite attachment at the tip of the embryo  
532 (Heiman and Shaham, 2009). It is unknown how this protein localizes to the tip of the  
533 dendrite, but one speculative possibility is that it could be delivered through  
534 cytokinesis-directed membrane trafficking. A stem cell marker protein is released in  
535 extracellular membrane particles by neuroepithelial cells from the cilium and  
536 midbody, showing a similarity between these two organelles (Dubreuil et al., 2007).  
537 Later in life, the worm releases exosomes from the sensory cilia that form at the tip of  
538 the dendrites of the sensilla for communication between animals (Wang et al., 2014a).  
539 Perhaps the initial secretory apparatus built during cytokinesis to promote cell  
540 division is recruited to the apical surface of these neurons to recruit machinery  
541 involved in exosome release. Further investigation is required to define the molecular  
542 contributions provided by the midbody to the apical surface of these tissues.

543         Once the midbody moves to the apical surface, we observe that different  
544 components of the midbody have different fates, which is an unexpected and novel  
545 observation. Typically, once the midbody is abscised from the cell, it is thought that

546 most midbody proteins are discarded with the remnant, as observed in the early  
547 embryo divisions. Aurora B kinase remains at the apical surface well after other  
548 midbody components like ZEN-4 are removed. The limit of the resolution of light  
549 microscopy does not allow us to characterize in detail how this occurs. The most  
550 likely model is that the midbody is cut from the plasma membrane and flanking  
551 proteins like Aurora B, RAB-11, and microtubules are left behind. Among the many  
552 mitotic functions of Aurora B, it is a critical regulator of the timing of abscission  
553 (Mathieu et al., 2013; Steigemann et al., 2009). Based on our observations of midbody  
554 flank microtubules, abscission may occur after the midbody migration event, and the  
555 delay in abscission might require Aurora B activity. Inhibition of Aurora B kinase in  
556 mouse embryos caused the loss of midbody derived interphase bridges and a  
557 reduction of RAB-11 and cell adhesion molecules delivered to apical membranes  
558 (Zenker et al., 2017). Aurora B also regulates a number of cytoskeletal regulators  
559 during cytokinesis that control cell shape (Ferreira et al., 2013; Floyd et al., 2013;  
560 Goto et al., 2003; Kettenbach et al., 2011), and it will be important to determine  
561 whether any are involved with the events we observed. In the intestine, the central  
562 spindle elongates dramatically as the midbody migrates, which might also be  
563 regulated by Aurora B (Bastos et al., 2013). Along these lines, altered expression of  
564 the central spindle protein PRC-1 (the homologue of *spd-1*) contributes to variant  
565 midzone microtubule density in different tissues in the *Xenopus* embryo, which  
566 correlates with changes to furrow ingression and midbody behavior (Kieserman et al.,  
567 2008). While we observe the centralspindlin component ZEN-4 becoming internalized  
568 and degraded in the three tissues, it was previously implicated in morphogenesis of  
569 the epidermis and pharynx (Hardin et al., 2008; Portereiko et al., 2004; Von Stetina et  
570 al., 2017). It remains to be determined whether this role is related to the dynamics of  
571 cytokinesis or a cytokinesis-independent function of ZEN-4 as previously suggested.  
572 Therefore, further study will be required to understand the role of the central spindle  
573 components during the specialized cytokinesis events that occur during  
574 morphogenesis.

575 In the sensilla, the centriole moves to the tip of the dendrite to form the base of  
576 the sensory cilia of these neurons (Dammermann et al., 2009; Nechipurenko et al.,  
577 2017; Perkins et al., 1986). Multiple central spindle proteins localize to the base of  
578 cilia in *Xenopus* epithelial cells and are required for cilia morphology after the  
579 divisions are completed in *C. elegans* (Kieserman et al., 2008; Smith et al., 2011).

580 Additionally, loss of Aurora B kinase causes aberrant neuronal axon morphology, and  
581 overexpression of Aurora B causes extended axonal outgrowth in zebrafish (Gwee et  
582 al., 2018). At the apical surface of the gut,  $\gamma$ -tubulin and other pericentriolar material  
583 is delivered from the centrosome while the centrioles are discarded. The gut apical  
584 membrane ultimately becomes elaborated with microvilli (Feldman and Priess, 2012;  
585 Leung et al., 1999). We also observed  $\gamma$ -tubulin at the apical surface of the pharynx  
586 and sensilla dendrites. Therefore, different material provided by the midbody and  
587 centrosome may contribute to the cytoskeletal architecture of the apical surface.  
588 Delineating the precise relationship between these two organelles and deciphering  
589 how cytokinesis contributes to proper cellular reorganization during morphogenesis  
590 will be a major focus of future studies.

591

## 592 **Acknowledgements**

593 Lattice light sheet microscopy was performed in collaboration with the  
594 Advanced Imaging Center at HHMI Janelia Research Campus, a facility jointly  
595 supported by the Gordon and Betty Moore Foundation and the Howard Hughes  
596 Medical Institute. We appreciate the CGC and Wormbase funded by the NIH Office  
597 of Research Infrastructure Programs (P40 OD010440) and National Human Genome  
598 Research Institute (U41 HG002223), which provided some *C. elegans* strains and  
599 genome information. We are grateful to members of the Bembenek laboratory for  
600 productive discussion, reagent preparation and handling strains. We also thank Dr.  
601 Max Heiman, Dr. Zhirong Bao for discussions and Dr. Don Fox, Dr. John White, Dr.  
602 John Heddleston, Dr. Heidi Hehnley-Chang, Lindsay Rathbun, and Erica Colicino for  
603 critical feedback on the manuscript.

604

## Figure Legends

### 605 **Figure 1. Cytokinesis in the first two mitotic divisions**

606 (A) Illustration of cytokinesis in the first two mitotic divisions indicating the invariant fate of  
607 the midbody after division. Orange arrowheads indicate the first midbody, while blue  
608 arrowheads indicate the AB midbody. (B-F) Cytokinesis labeled with AIR-2::GFP (green)  
609 and PH::mCherry (magenta), H2B::mCherry (magenta). During late anaphase, Aurora B  
610 localizes on the central spindle (B) which condenses into the midbody flank (C, orange  
611 arrowhead) and remains on the midbody until it is internalized by the AB daughter cell (D,  
612 orange arrowhead). During the second mitosis, the furrow is highly asymmetric and sweeps  
613 the central spindle against the EMS boundary, where the midbody forms (E, blue arrowhead).  
614 EMS engulfs the midbody instead of either of the AB daughter cells (F, blue arrowhead). (G-  
615 K) NMY-2::GFP (green) and PH::mCherry (magenta) show localization to the furrow (G) and  
616 midbody ring (H-K). (L-P) ZEN-4::GFP (green) appears on the central spindle (L) and the  
617 midbody (M-P). (Q-U) RAB-11::mCherry (green) co-localized with AIR-2::GFP (magenta)  
618 briefly at the midbody, but does not remain on the midbody once it is internalized into cytosol  
619 (R-U). (V-X) Quantification of furrow asymmetry, measurement illustrated in V, W. (X)  
620 Asymmetry parameter is significantly greater in second cell division. Scale bar, 10  $\mu$ m.

621

### 622 **Figure 2. Cytokinesis in the E8-E16 intestinal divisions**

623 (A) Diagram of cytokinesis in the intestinal E8-E16 mitotic divisions indicating localization  
624 of Aurora B (green, midbody ring in magenta) (B-D) Lattice light sheet imaging of E8-E16  
625 intestinal cell divisions in embryos expressing AIR-2::GFP (green) with PH::mCherry  
626 (magenta). AIR-2::GFP labels midbodies (labeled 1-8 in B) in the middle of daughter cell  
627 pairs, which migrate (arrowheads, C) to the nascent apical membrane where it persists well  
628 after polarization is complete (time shown in minutes:seconds bottom left). (E-G) Spinning  
629 disc confocal microscopy of AIR-2::GFP (green) with H2B::mCherry (magenta) and  
630 PH::mCherry, (magenta, time shown in minutes:seconds bottom left). (H) Image series of  
631 Epla division with AIR-2::GFP (green, PH::mCherry, magenta) starting in prometaphase,  
632 clearly indicating midbody formation and migration to apical midline. (I-K) NMY-2 (green)  
633 localizes to furrows, then midbody rings (labeled 1-8 in F) that move to the midline  
634 (arrowheads, J) but do not persist (rectangle box in K). (L) Montage showing a single NMY-  
635 2::GFP labeled midbody migrating to midline. (M-N) Single plane imaging of midbody  
636 dynamics in individual intestine cell shows extension of the central spindle and apical  
637 membrane localization of AIR-2::GFP (M) and rapid internalization of ZEN-4::GFP (N) to  
638 the cytosol (time in minute: second indicated on right top). (O) Quantification of midline

639 perdurance of different midbody components (measured from the end of furrowing to  
640 internalization or loss of signal). (P) Illustration of E8 division and (Q) quantification of the  
641 ratio of maximal midbody flank length to cell length. Scale bar, 10  $\mu$ m. Error bars indicate  
642 standard deviation of the mean.

643

### 644 **Figure 3. Comparison of central spindle microtubule dynamics**

645 Imaging of microtubule dynamics during different cell divisions to visualize central spindle  
646 and midbody flank microtubules. (A-B) AIR-2::GFP (magenta) and  $\beta$ -tubulin TBB-  
647 1::mCherry (green) colocalize at the central spindle during anaphase and furrowing in the first  
648 cell division. AIR-2::GFP persists at the midbody after microtubules are lost, which correlates  
649 closely with abscission timing (B). (C-D) AIR-2::GFP (magenta) and  $\beta$ -tubulin TBB-  
650 1::mCherry (green) colocalize on the central spindle adjacent to EMS after highly asymmetric  
651 furrowing. Microtubules are lost in a similar amount of time as the first division (D). (E-G)  
652 Tubulin TBB-1::mCherry (green) and AIR-2::GFP (magenta) localize to an extended flank  
653 region during intestinal midbody migration (F, arrowheads). (G) Tubulin and AIR-2 persist at  
654 the apical membrane after polarization (rectangle box). (H) Single z-plane imaging of  
655 midbody flank microtubules (arrowheads) from the dorsal aspect during Epra cell division  
656 and midbody migration. The extended flanking microtubules persist at least 3 times longer  
657 than earlier divisions throughout the migration process until they can no longer be  
658 distinguished from other microtubules at the apical surface. (I) Quantification of tubulin  
659 persistence time at the central spindle during different cell divisions. Scale bar, 10  $\mu$ m. Error  
660 bars indicated standard deviation of the mean.

661

### 662 **Figure 4. Cytokinesis mutants have disrupted intestinal morphogenesis**

663 Shifting temperature-sensitive cytokinesis mutants to 25  $^{\circ}$ C at the E4-E8 stage until they  
664 reach the bean stage causes severe lumen defects in the intestine. (A) Timeline of cell division  
665 events in the intestine emphasizing E4-E8 timing and E8-E16 cytokinesis and the timing of  
666 temperature shift experiments. (B) ERM-1 staining in wild type bean stage embryos is  
667 enriched at the apical midline of the intestine (dotted rectangle). Maximum z-projected  
668 images color-coded according to Z-depth (using FIJI temporal-color code plugin, scale shown  
669 in I) to visualize the three-dimensional position of ERM-1 and nuclei (B-G, I). In *air*-  
670 *2(or207ts)*, multiple defects are observed, including mispositioning of the entire intestine (C-  
671 E), branches in the apical surface (C), gaps in the apical surface creating a discontinuous  
672 lumen (D), or broader staining of ERM-1 (E). (F) The *zen-4(or153ts)* mutant causes many of

673 these phenotypes, including branching of the apical surface. (G) There are subtle lumen and  
674 nuclei position defects in *spd-1(oj5ts)* embryos. (H) Quantification of apical defects observed  
675 by ERM-1 staining in the different mutants. (I) Quantification of the defective z-plane  
676 distribution of the apical surface in the different mutants. The more colors a lumen has in the  
677 projection, the more skewed in the Z-axis it is within the embryo. Scale bar, 10  $\mu$ m.

678

### 679 **Figure 5. Cytokinesis During Pharyngeal Precursor Cell Polarization**

680 (A) Illustration of the mesenchymal to epithelial transition of pharyngeal precursor cells  
681 (PPCs) showing cell division and dynamics of Aurora B (green, midbody ring in magenta).  
682 (B-E) PPC division labeled with AIR-2::GFP (green, H2B::mCherry in magenta) from both  
683 ventral (B-D) and dorsal (E) views. AIR-2::GFP localizes to chromatin in metaphase (B) and  
684 moves to the central spindle in anaphase (C) and appears on the midbody which moves  
685 toward the midline (D). AIR-2 persists at the apical surface for an extended time (E, time in  
686 minutes:seconds indicated below). (F) Image series showing an AIR-2::GFP labeled midbody  
687 migrating toward the midline. Imaging two different midbody ring components, (G-K) ZEN-4  
688 (green, TBB-1::mCherry in magenta) and (L-P) NMY-2 (green, TBB-1::mCherry in  
689 magenta), shows the movement of the midbody to the midline (I, N). ZEN-4 does not persist  
690 (J, arrowheads indicate internalized midbodies not yet degraded), while NMY-2 accumulates  
691 at the apical midline during apical constriction (O). Time shown in minutes: seconds. Scale  
692 bar, 10  $\mu$ m.

693

### 694 **Figure 6. Midbody components label dendrites of sensilla neurons**

695 (A) Diagram of sensilla precursor cell (SPC) divisions and the localization of the AIR-2::GFP  
696 at the midbody during cytokinesis until the apical clustering during polarization. (B-D)  
697 Cytokinesis in SPCs in the anterior lateral region of the embryo expressing AIR-2::GFP  
698 (green, H2B::Cherry in magenta) gives rise to multiple midbodies (arrowheads B,C) that  
699 cluster together at the lateral sides of the embryos (D). (E) The midbody ring marker ZEN-  
700 4::GFP (green, microtubules in magenta) is internalized and degraded before the cluster  
701 forms, which is also concentrated with microtubules (arrowheads). (F) NMY-2::GFP (green,  
702 microtubules in magenta) localizes to midbodies that cluster and remain at the tip as the  
703 dendrite extension forms. (G) PAR-6::mCherry (green, AIR-2::GFP in magenta) localizes to  
704 tip of the cluster (arrowheads) and persists at the tip of the dendrites as they extend, indicating  
705 that this is the apical surface of these cells. (H-J) After the apical surface cluster forms, AIR-  
706 2::GFP remains at the tip (red arrowheads) as the cells migrate to the nose of the animal. AIR-

707 2::GFP also labels a substantial portion of the length of the dendrite as they extend (J). Insert  
708 in (J) is a rotated max z-projection showing the anterior end of the animal after multiple  
709 sensilla form (J). Time shown in minutes:seconds. Scale bar, 10  $\mu$ m.

710

711 **Figure 7. Cytokinesis mutants have disrupted sensilla neuron morphogenesis**

712 (A-E) Visualizing dendrite and neuron morphology by DiI staining in surviving larvae after  
713 shifting mutants to 25 °C at the E4 or E8 stage until hatching. (A) In wild type animals, two  
714 dendrite bundles can be clearly observed as well as amphid and phasmid neurons. (B-E)  
715 Hatched mutant larvae displayed a variety of neurite defects, including No-DiI signal (B, F),  
716 Weak signal (C, G), dendrite shape and positioning defects (D) and additional diffuse staining  
717 throughout the head of the animal (E, H, I).

718

## 719 **Materials and Methods**

### 720 ***C. elegans* Strains**

721 *C. elegans* strains were maintained with standard protocols. *C. elegans* strains  
722 expressing midbody proteins driven by the *pie-1* promoter are listed in Table 2. All  
723 temperature-sensitive mutants were obtained from the Caenorhabditis Genetics  
724 Center.

725

### 726 **Embryo Preparation and Imaging**

727 For live imaging, young gravid hermaphrodites were dissected in M9 buffer  
728 containing polystyrene microspheres and sealed between two coverslips with vaseline  
729 (Pohl and Bao, 2010). Live cell imaging was performed on a spinning disk confocal  
730 system that uses a Nikon Eclipse inverted microscope with a 60 X 1.40NA objective,  
731 a CSU-22 spinning disc system, and a Photometrics EM-CCD camera from Visitech  
732 International. Images were acquired by Metamorph (Molecular Devices) and analyzed  
733 by ImageJ/FIJI Bio-Formats plugins (National Institutes of Health) (Linkert et al.,  
734 2010; Schindelin et al., 2012). Whole embryo live imaging was performed on a lattice  
735 light sheet microscopes housed in the Eric Betzig lab, Bi-Chang Chen lab, or the  
736 Advanced Imaging Center at HHMI Janelia. The system is configured and operated as  
737 previously described (Chen et al., 2014). Briefly, embryos were dissected out and  
738 adhered to 5 mm round glass coverslips (Warner Instruments, Catalog # CS-5R).  
739 Samples were illuminated by lattice light-sheet using 488 nm or 560 nm diode lasers  
740 (MPB Communications) through an excitation objective (Special Optics, 0.65 NA,  
741 3.74-mm WD). Fluorescent emission was collected by detection objective (Nikon,  
742 CFI Apo LWD 25XW, 1.1 NA), and detected by a sCMOS camera (Hamamatsu Orca  
743 Flash 4.0 v2). Acquired data were deskewed as previously described (Chen et al.,  
744 2014) and deconvolved using an iterative Richardson-Lucy algorithm. Point-spread  
745 functions for deconvolution were experimentally measured using 200nm tetraspeck  
746 beads adhered to 5 mm glass coverslips (Invitrogen, Catalog # T7280) for each  
747 excitation wavelength.

748

### 749 **Immunostaining Assay in *C. elegans* Embryos**

750 Apical marker staining was performed with the freeze-crack methanol protocol  
751 (Leung et al., 1999). Immunostaining with anti-AIR-2 antibodies was performed as  
752 described (Schumacher et al., 1998). Primary antibodies and (dilutions) used were



753 anti-ERM-1 (1:200); P4A1/PAR-3 (1:200); DLG-1 (1:200); MH33 (1:150); AIR-2  
754 (1:50). 1:200-400 dilutions of Alexa 588 and 468 secondary antibodies were used in  
755 the study. To stain temperature-sensitive mutants, two-cell stage embryos were  
756 dissected from gravid worms, mounted in 10  $\mu$ L of M9 buffer, and kept cold on ice.  
757 The two-cell stage embryos were incubated at 15 °C for 4-7 hours until specific  
758 stages, then shifted to the restrictive temperature (25 °C) for 2-4 hours and stained as  
759 described above.

760

### 761 **DiI staining in *C. elegans***

762 DiI staining of wild-type and temperature sensitive mutants was done as previously  
763 described (Tong and Burglin, 2010). Two-cell stage embryos were incubated at 15 °C  
764 for 6.5~7 hours until they reached the polarized E16 stage, then shifted to the  
765 restrictive temperature (25 °C) with 1:200 dilution of stock DiI dye solution  
766 containing 2 mg/mL DiI in dimethyl formamide for 18-24 hours. Hatched larvae were  
767 transferred to M9 and washed twice in M9 before mounting in 25 mM levamisole on  
768 2% agar pads for imaging.

769

### 770 **Temperature-Shift Experiments**

771 Temperature-sensitive mutants were maintained at 15 °C. To perform temperature  
772 shifts on staged embryos, gravid adults were transferred to a dissection chamber (<  
773 4 °C), which was precooled in ice bucket, with 20  $\mu$ L of ice-cold M9 Buffer. Two-  
774 Cell stage embryos were quickly transferred (within a 5-10 minute time window) via  
775 mouth pipette (Aspirator tube assemblies, Sigma) to Fisherbrand Hanging Drop Slides  
776 (Catalogue #12-560B) on ice. The slide was placed into a humidified chamber and  
777 incubated at 15 °C until the appropriate stages were reached and then shifted to 26 °C.  
778 Incubation times were determined based on *C. elegans* embryonic lineage timing and  
779 adjusted according to DAPI staining to ensure each mutant was shifted at a similar  
780 stage of embryo development. To inactivate *air-2* (*or207ts*), mutant embryos were  
781 incubated for 5 hours at 15 °C and shifted to 26 °C for 3 hours to reach the bean stage  
782 or 5 hours at 26 °C to reach the comma stage. This was the minimum amount of time  
783 to shift embryos to non-permissive temperature and observe significant cytokinesis  
784 defects by the E8-E16 division, indicating significant reduction of AIR-2 function.  
785 Most embryos reached the E4-E8 division at the time of the shift. By live imaging we

786 found that there was little disruption of the E4-E8 division under these conditions  
787 since (n=4/5) *air-2 (or207ts)* embryos have 8 normal E8 cells. N2, *spd-1 (oj5ts)*, and  
788 *zen-4 (or153ts)* embryos were incubated for 4.5 hours at 15 °C to reach E4-E8 stage,  
789 followed by 3 hours at 26 °C to reach the bean stage and 5 hours at 26 °C to reach the  
790 comma stage. To shift embryos at the comma stage, *air-2 (or207ts)* embryos were  
791 incubated for 12 hours at 15 °C and N2, *spd-1 (oj5ts)* and *zen-4 (or153ts)* embryos  
792 were incubated 11-11.5 hours at 15 °C.

793

794

795

796 **Table 1. Hatch rate of temperature sensitive mutants.**

797

| <b>Stage Before Shifting</b> | <b>Genotype</b>        | <b>Hatch Rate % (Hatch Embryos/Total)</b> |
|------------------------------|------------------------|-------------------------------------------|
| 15 °C Forever                | N2                     | 100% (32/32)                              |
|                              | <i>air-2 (or207ts)</i> | 53.6% (37/69)                             |
|                              | <i>zen-4 (or153ts)</i> | 100% (28/28)                              |
|                              | <i>spd- (oj5ts)</i>    | 100% (35/35)                              |
| E4-E8                        | N2                     | 100% (26/26)                              |
|                              | <i>air-2 (or207ts)</i> | 6.3% (2/32)                               |
|                              | <i>zen-4 (or153ts)</i> | 0% (0/57)                                 |
|                              | <i>spd- (oj5ts)</i>    | 100% (48/48)                              |
| E8-E16                       | N2                     | 100% (45/45)                              |
|                              | <i>air-2 (or207ts)</i> | 14.4% (13/90)                             |
|                              | <i>zen-4 (or153ts)</i> | 10.1% (10/99)                             |
|                              | <i>spd- (oj5ts)</i>    | 100% (83/83)                              |
| Comma-1.5 Fold               | N2                     | 100% (36/36)                              |
|                              | <i>air-2 (or207ts)</i> | 33.7% (31/92)                             |
|                              | <i>zen-4 (or153ts)</i> | 85.7% (54/63)                             |
|                              | <i>spd- (oj5ts)</i>    | 100% (27/27)                              |

798

799 **Table 2. Quantification of DiI Staining of Temperature-Sensitive Mutants**

800

| Stage Before Shifting | Genotype              | No DiI Signal | Weak DiI signal | Shape & Position Defect | Extended DiI Staining |
|-----------------------|-----------------------|---------------|-----------------|-------------------------|-----------------------|
| 15 °C Forever         | N2                    | 0% (0/32)     | 0% (0/32)       | 0% (0/32)               | 0% (0/32)             |
|                       | <i>air-2(or207ts)</i> | 2.7% (1/37)   | 8.1% (3/37)     | 2.7% (1/37)             | 0% (0/37)             |
|                       | <i>zen-4(or153ts)</i> | 0% (0/18)     | 0% (0/18)       | 0% (0/18)               | 0% (0/18)             |
|                       | <i>spd-1(oj5ts)</i>   | 0% (0/34)     | 0% (0/34)       | 0% (0/34)               | 0% (0/34)             |
|                       | N2                    | 0% (0/10)     | 0% (0/10)       | 0% (0/10)               | 0% (0/10)             |
|                       | N2                    | 50% (1/2)     | 0% (0/2)        | 50% (1/2)               | 0% (0/2)              |
| E4-E8                 | <i>air-2(or207ts)</i> | 0% (0/0)      | 0% (0/0)        | 0% (0/0)                | 0% (0/0)              |
|                       | <i>zen-4(or153ts)</i> | 0% (0/44)     | 4.5% (2/44)     | 9.1% (4/44)             | 6.8% (3/44)           |
|                       | <i>spd-1(oj5ts)</i>   | 0% (0/29)     | 0% (0/29)       | 0% (0/29)               | 0% (0/29)             |
|                       | N2                    | 16.7% (2/12)  | 58.3% (7/12)    | 58.3% (7/12)            | 0% (0/12)             |
| E8-E16                | <i>air-2(or207ts)</i> | 77.8% (7/9)   | 11.1% (1/9)     | 22.2% (2/9)             | 0% (0/9)              |
|                       | <i>zen-4(or153ts)</i> | 0% (0/59)     | 0% (0/59)       | 8.5% (5/59)             | 5.1% (3/59)           |
|                       | <i>spd-1(oj5ts)</i>   | 0% (0/21)     | 0% (0/21)       | 0% (0/21)               | 0% (0/21)             |
|                       | N2                    | 6.9% (2/29)   | 10.3% (3/29)    | 0% (0/29)               | 13.8% (4/29)          |
| Comma-1.5 Fold        | <i>air-2(or207ts)</i> | 0% (0/53)     | 0% (0/53)       | 0% (0/53)               | 22.6% (12/53)         |
|                       | <i>zen-4(or153ts)</i> | 0% (0/18)     | 0% (0/18)       | 0% (0/18)               | 33.3% (6/18)          |
|                       | <i>spd-1(oj5ts)</i>   |               |                 |                         |                       |
|                       | N2                    |               |                 |                         |                       |

801 **Table 3. Strains used in this study.**

| Strain | Genotype                                                                                                                                                                          |
|--------|-----------------------------------------------------------------------------------------------------------------------------------------------------------------------------------|
| N2     | Bristol (wild-type)                                                                                                                                                               |
| EKM48  | <i>unc-119(ed3) iii; ojIs51 [Ppie-1::GFP::air-2; unc-119(+)]</i>                                                                                                                  |
| EKM50  | <i>unc-119(ed3) iii; ojIs51 [Ppie-1::GFP::air-2; unc-119(+)]; ItIs37 [Ppie-1::mCherry::his-58 (pAA64); unc-119(+)] iv; ItIs44 [Ppie-1::mCherry::PH (PLC1delta1); unc-119(+)]v</i> |
| EKM51  | <i>unc-119(ed3) iii; ojIs51 [Ppie-1::GFP::air-2; unc-119(+)]; ItIs37 [Ppie-1::mCherry::his-58 (pAA64); unc-119(+)] iv</i>                                                         |
| EKM52  | <i>unc-119(ed3) iii; ojIs51 [Ppie-1::GFP::air-2; unc-119(+)]; ItIs44 [Ppie-1::mCherry::PH (PLC1delta1); unc-119(+)] v</i>                                                         |
| JAB23  | <i>unc-119(ed3) iii; ojIs51 [Ppie-1::GFP::air-2; unc-119(+)]; wels21 [pJA138 (pie-1::mCherry::tub)]</i>                                                                           |
| JAB60  | <i>unc-119(ed3) iii; ojIs51 [Ppie-1::GFP::air-2; unc-119(+)]; pwIs476 [Ppie-1::mCherry::rab-11]</i>                                                                               |
| JAB116 | <i>unc-119(ed3) iii; wels21 [pJA138 (Pie-1::mCherry::tub)]; unc-119(+); zuIs45 [nmy-2::NMY-2::GFP; unc-119(+)] v</i>                                                              |
| NWG002 | <i>unc-119(ed3) iii; ItIs44 [Ppie-1::mCherry::PH (PLC1delta1); unc-119(+)]v; zuIs45 [nmy-2::NMY-2::GFP; unc-119(+)] v</i>                                                         |
| JAB24  | <i>zen-4(or153ts) iv; xsEx6 [zen-4::GFP; rol-6 (su1006)]; unc-119(ed3) iii; wels21 [pJA138 (pie-1::mCherry::tub)]</i>                                                             |
| JAB34  | <i>zen-4(or153) iv; xsEx6 [zen-4::GFP; rol-6 (su1006)]; unc-119(ed3) iii; ItIs44 [Ppie-1::mCherry::PH (PLC1delta1); unc-119(+)] v</i>                                             |
| JAB32  | <i>unc-119(ed3) iii; ddIs26 [Ppie-1::mCherry::T26E3.3; unc-119(+)]v; ojIs51 [Ppie-1::GFP::air-2; unc-119(+)]</i>                                                                  |
| EU630  | <i>air-2(or207) i.</i>                                                                                                                                                            |
| EU716  | <i>zen-4(or153) iv.</i>                                                                                                                                                           |

|       |                                                                                                                                                 |
|-------|-------------------------------------------------------------------------------------------------------------------------------------------------|
| WH12  | <i>spd-1 (oj5) i.</i>                                                                                                                           |
| WH421 | <i>unc-119(ed3) iii; ojIs51 [Ppie-1::GFP::air-2; unc-119(+)];spd-1 (oj5) i.</i>                                                                 |
| JAB39 | <i>unc-119(ed3) iii; ruls32III;dd156[tbg-1::GFP;unc-119(+)];; ojIs51 [Ppie-1::GFP::air-2; unc-119(+)];spd-1 (oj5) i.</i>                        |
| JAB52 | <i>unc-119(ed3) iii; ruls32III;dd156[tbg-1::GFP;unc-119(+)]; ruls32[Ppi-1::GFP::His-58; unc-119(ed3); weIs21 [pJA138 (pie-1::mCherry::tub)]</i> |

802

## 803 Bibliography

- 804 Ai, E., Poole, D.S., and Skop, A.R. (2009). Rack-1 Directs Dynactin-dependent RAB-11  
805 Endosomal Recycling during Mitosis in *Caenorhabditis elegans* (vol 20, 1629, 2009). *Mol*  
806 *Biol Cell* 20, 5036-5036.
- 807 Albertson, R., Riggs, B., and Sullivan, W. (2005). Membrane traffic: a driving force in  
808 cytokinesis. *Trends Cell Biol* 15, 92-101.
- 809 Amini, R., Goupil, E., Labella, S., Zetka, M., Maddox, A.S., Labbe, J.C., and Chartier, N.T.  
810 (2015). *C. elegans* Anillin proteins regulate intercellular bridge stability and germline  
811 syncytial organization (vol 206, pg 129, 2014). *J Cell Biol* 209, 467-467.
- 812 Bai, X.F., and Bembenek, J.N. (2017). Protease dead separase inhibits chromosome  
813 segregation and RAB-11 vesicle trafficking. *Cell Cycle* 16, 1902-1917.
- 814 Bastos, R.N., Gandhi, S.R., Baron, R.D., Gruneberg, U., Nigg, E.A., and Barr, F.A. (2013).  
815 Aurora B suppresses microtubule dynamics and limits central spindle size by locally  
816 activating KIF4A. *J Cell Biol* 202, 605-621.
- 817 Bembenek, J.N., Verbrugghe, K.J.C., Khanikar, J., Csankovszki, G., and Chan, R.C. (2013).  
818 Condensin and the Spindle Midzone Prevent Cytokinesis Failure Induced by Chromatin  
819 Bridges in *C. elegans* Embryos. *Curr Biol* 23, 937-946.
- 820 Bembenek, J.N., White, J.G., and Zheng, Y.X. (2010). A Role for Separase in the Regulation  
821 of RAB-11-Positive Vesicles at the Cleavage Furrow and Midbody. *Curr Biol* 20, 259-264.
- 822 Bernabe-Rubio, M., Andres, G., Casares-Arias, J., Fernandez-Barrera, J., Rangel, L., Reglero-  
823 Real, N., Gershlick, D.C., Fernandez, J.J., Millan, J., Correas, I., *et al.* (2016). Novel role for  
824 the midbody in primary ciliogenesis by polarized epithelial cells. *J Cell Biol* 214, 259-273.
- 825 Bringmann, H., and Hyman, A.A. (2005). A cytokinesis furrow is positioned by two  
826 consecutive signals. *Nature* 436, 731-734.
- 827 Canman, J.C., Hoffman, D.B., and Salmon, E.D. (2000). The role of pre- and post-anaphase  
828 microtubules in the cytokinesis phase of the cell cycle. *Curr Biol* 10, 611-614.
- 829 Carlton, J.G., Caballe, A., Agromayor, M., Kloc, M., and Martin-Serrano, J. (2012). ESCRT-  
830 III Governs the Aurora B-Mediated Abscission Checkpoint Through CHMP4C. *Science* 336,  
831 220-225.
- 832 Carmena, M., Earnshaw, W.C., and Glover, D.M. (2015). The Dawn of Aurora Kinase  
833 Research: From Fly Genetics to the Clinic. *Front Cell Dev Biol* 3, 73.
- 834 Chen, B.C., Legant, W.R., Wang, K., Shao, L., Milkie, D.E., Davidson, M.W., Janetopoulos,  
835 C., Wu, X.F.S., Hammer, J.A., Liu, Z., *et al.* (2014). Lattice light-sheet microscopy: Imaging  
836 molecules to embryos at high spatiotemporal resolution. *Science* 346, 439-+.
- 837 Chen, C.T., Ettinger, A.W., Huttner, W.B., and Doxsey, S.J. (2013). Resurrecting remnants:  
838 the lives of post-mitotic midbodies. *Trends Cell Biol* 23, 118-128.
- 839 Crowell, E.F., Gaffuri, A.L., Gayraud-Morel, B., Tajbakhsh, S., and Echard, A. (2014).  
840 Engulfment of the midbody remnant after cytokinesis in mammalian cells. *J Cell Sci* 127,  
841 3840-3851.
- 842 Dammermann, A., Pemble, H., Mitchell, B.J., McLeod, I., Yates, J.R., Kintner, C., Desai,  
843 A.B., and Oegema, K. (2009). The hydrolethalus syndrome protein HYLS-1 links core  
844 centriole structure to cilia formation. *Gene Dev* 23, 2046-2059.
- 845 Dubreuil, V., Marzesco, A.M., Corbeil, D., Huttner, W.B., and Wilsch-Brauninger, M.  
846 (2007). Midbody and primary cilium of neural progenitors release extracellular membrane  
847 particles enriched in the stem cell marker prominin-1. *J Cell Biol* 176, 483-495.
- 848 Eggert, U.S., Mitchison, T.J., and Field, C.M. (2006). Animal cytokinesis: From parts list to  
849 mechanisms. *Annu Rev Biochem* 75, 543-566.
- 850 El Amine, N., Kechad, A., Jananji, S., and Hickson, G.R. (2013). Opposing actions of septins  
851 and Sticky on Anillin promote the transition from contractile to midbody ring. *J Cell Biol*  
852 203, 487-504.
- 853 Ettinger, A.W., Wilsch-Brauninger, M., Marzesco, A.M., Bickle, M., Lohmann, A., Maliga,  
854 Z., Karbanova, J., Corbeil, D., Hyman, A.A., and Huttner, W.B. (2011). Proliferating versus

855 differentiating stem and cancer cells exhibit distinct midbody-release behaviour. *Nat*  
856 *Commun* 2, 503.

857 Feldman, J.L., and Priess, J.R. (2012). A role for the centrosome and PAR-3 in the hand-off  
858 of MTOC function during epithelial polarization. *Curr Biol* 22, 575-582.

859 Ferreira, J.G., Pereira, A.J., Akhmanova, A., and Maiato, H. (2013). Aurora B spatially  
860 regulates EB3 phosphorylation to coordinate daughter cell adhesion with cytokinesis. *J Cell*  
861 *Biol* 201, 709-724.

862 Floyd, S., Whiffin, N., Gavilan, M.P., Kutscheidt, S., De Luca, M., Marcozzi, C., Min, M.,  
863 Watkins, J., Chung, K., Fackler, O.T., *et al.* (2013). Spatiotemporal organization of Aurora-B  
864 by APC/CCdh1 after mitosis coordinates cell spreading through FHOD1. *J Cell Sci* 126,  
865 2845-2856.

866 Fox, D.T., and Duronio, R.J. (2013). Endoreplication and polyploidy: insights into  
867 development and disease. *Development* 140, 3-12.

868 Goto, H., Yasui, Y., Kawajiri, A., Nigg, E.A., Terada, Y., Tatsuka, M., Nagata, K., and  
869 Inagaki, M. (2003). Aurora-B regulates the cleavage furrow-specific vimentin  
870 phosphorylation in the cytokinetic process. *J Biol Chem* 278, 8526-8530.

871 Green, R.A., Mayers, J.R., Wang, S., Lewellyn, L., Desai, A., Audhya, A., and Oegema, K.  
872 (2013). The midbody ring scaffolds the abscission machinery in the absence of midbody  
873 microtubules. *J Cell Biol* 203, 505-520.

874 Green, R.A., Paluch, E., and Oegema, K. (2012). Cytokinesis in Animal Cells. *Annu Rev Cell*  
875 *Dev Bi* 28, 29-+.

876 Greenbaum, M.P., Ma, L., and Matzuk, M.M. (2007). Conversion of midbodies into germ cell  
877 intercellular bridges. *Developmental Biology* 305, 389-396.

878 Guizetti, J., Schermelleh, L., Mantler, J., Maar, S., Poser, I., Leonhardt, H., Muller-Reichert,  
879 T., and Gerlich, D.W. (2011). Cortical constriction during abscission involves helices of  
880 ESCRT-III-dependent filaments. *Science* 331, 1616-1620.

881 Gwee, S.S.L., Radford, R.A.W., Chow, S., Syal, M.D., Morsch, M., Formella, I., Lee, A.,  
882 Don, E.K., Badrock, A.P., Cole, N.J., *et al.* (2018). Aurora kinase B regulates axonal  
883 outgrowth and regeneration in the spinal motor neurons of developing zebrafish. *Cell Mol*  
884 *Life Sci*.

885 Haglund, K., Nezis, I.P., and Stenmark, H. (2011). Structure and functions of stable  
886 intercellular bridges formed by incomplete cytokinesis during development. *Commun Integr*  
887 *Biol* 4, 1-9.

888 Hardin, J., King, R., Thomas-Virnic, C., and Raich, W.B. (2008). Zygotic loss of ZEN-  
889 4/MKLP1 results in disruption of epidermal morphogenesis in the *C. elegans* embryo. *Dev*  
890 *Dyn* 237, 830-836.

891 Hedgecock, E.M., and White, J.G. (1985). Polyploid Tissues in the Nematode  
892 *Caenorhabditis-Elegans*. *Developmental Biology* 107, 128-133.

893 Heiman, M.G., and Shaham, S. (2009). DEX-1 and DYF-7 establish sensory dendrite length  
894 by anchoring dendritic tips during cell migration. *Cell* 137, 344-355.

895 Herszterg, S., Leibfried, A., Bosveld, F., Martin, C., and Bellaiche, Y. (2013). Interplay  
896 between the Dividing Cell and Its Neighbors Regulates Adherens Junction Formation during  
897 Cytokinesis in Epithelial Tissue. *Dev Cell* 24, 256-270.

898 Herszterg, S., Pinheiro, D., and Bellaiche, Y. (2014). A multicellular view of cytokinesis in  
899 epithelial tissue. *Trends Cell Biol* 24, 285-293.

900 Hime, G.R., Brill, J.A., and Fuller, M.T. (1996). Assembly of ring canals in the male germ  
901 line from structural components of the contractile ring. *Journal of Cell Science* 109, 2779-  
902 2788.

903 Hu, C.K., Coughlin, M., and Mitchison, T.J. (2012). Midbody assembly and its regulation  
904 during cytokinesis. *Mol Biol Cell* 23, 1024-1034.

905 Jordan, S.N., and Canman, J.C. (2012). Rho GTPases in Animal Cell Cytokinesis: An  
906 Occupation by the One Percent. *Cytoskeleton* 69, 919-930.

907 Kettenbach, A.N., Schweppe, D.K., Faherty, B.K., Pechenick, D., Pletnev, A.A., and Gerber,  
908 S.A. (2011). Quantitative Phosphoproteomics Identifies Substrates and Functional Modules of  
909 Aurora and Polo-Like Kinase Activities in Mitotic Cells. *Sci Signal* 4.



- 910 Kieserman, E.K., Glotzer, M., and Wallingford, J.B. (2008). Developmental regulation of  
911 central spindle assembly and cytokinesis during vertebrate embryogenesis. *Curr Biol* 18, 116-  
912 123.
- 913 Konig, J., Frankel, E.B., Audhya, A., and Muller-Reichert, T. (2017). Membrane remodeling  
914 during embryonic abscission in *Caenorhabditis elegans*. *J Cell Biol*.
- 915 Lacroix, B., and Maddox, A.S. (2012). Cytokinesis, ploidy and aneuploidy. *J Pathol* 226, 338-  
916 351.
- 917 Leung, B., Hermann, G.J., and Priess, J.R. (1999). Organogenesis of the *Caenorhabditis*  
918 *elegans* intestine. *Dev Biol* 216, 114-134.
- 919 Li, D.Y., Mangan, A., Cicchini, L., Margolis, B., and Prekeris, R. (2014). FIP5  
920 phosphorylation during mitosis regulates apical trafficking and lumenogenesis. *Embo Rep* 15,  
921 428-437.
- 922 Li, R. (2007). Cytokinesis in development and disease: variations on a common theme. *Cell*  
923 *Mol Life Sci* 64, 3044-3058.
- 924 Linkert, M., Rueden, C.T., Allan, C., Burel, J.M., Moore, W., Patterson, A., Loranger, B.,  
925 Moore, J., Neves, C., MacDonald, D., *et al.* (2010). Metadata matters: access to image data in  
926 the real world. *J Cell Biol* 189, 777-782.
- 927 Lujan, P., Varsano, G., Rubio, T., Hennrich, M.L., Sachsenheimer, T., Galvez-Santisteban,  
928 M., Martin-Belmonte, F., Gavin, A.C., Brugger, B., and Kohn, M. (2016). Phosphatase of  
929 regenerating liver (PRL)-3 disrupts epithelial architecture by altering the post-mitotic  
930 midbody position. *J Cell Sci*.
- 931 Maddox, A.S., Habermann, B., Desai, A., and Oegema, K. (2005). Distinct roles for two C-  
932 *elegans* anillins in the gonad and early embryo. *Development* 132, 2837-2848.
- 933 Maddox, A.S., Lewellyn, L., Desai, A., and Oegema, K. (2007). Anillin and the septins  
934 promote asymmetric ingression of the cytokinetic furrow. *Dev Cell* 12, 827-835.
- 935 Mathieu, J., Cauvin, C., Moch, C., Radford, S.J., Sampaio, P., Perdigoto, C.N., Schweisguth,  
936 F., Bardin, A.J., Sunkel, C.E., Mckim, K., *et al.* (2013). Aurora B and Cyclin B Have  
937 Opposite Effects on the Timing of Cytokinesis Abscission in *Drosophila* Germ Cells and in  
938 Vertebrate Somatic Cells. *Dev Cell* 26, 250-265.
- 939 McLachlan, I.G., and Heiman, M.G. (2013). Shaping dendrites with machinery borrowed  
940 from epithelia. *Curr Opin Neurobiol* 23, 1005-1010.
- 941 McLean, P.F., and Cooley, L. (2013). Protein Equilibration Through Somatic Ring Canals in  
942 *Drosophila*. *Science* 340, 1445-1447.
- 943 Morais-de-Sa, E., and Sunkel, C. (2013). Adherens junctions determine the apical position of  
944 the midbody during follicular epithelial cell division. *Embo Rep* 14, 696-703.
- 945 Nechipurenko, I.V., Berciu, C., Sengupta, P., and Nicastro, D. (2017). Centriolar remodeling  
946 underlies basal body maturation during ciliogenesis in *Caenorhabditis elegans*. *eLife* 6.
- 947 Norden, C., Mendoza, M., Dobbelaere, J., Kotwaliwale, C.V., Biggins, S., and Barral, Y.  
948 (2006). The NoCut pathway links completion of cytokinesis to spindle midzone function to  
949 prevent chromosome breakage. *Cell* 125, 85-98.
- 950 Oegema, K., and Hyman, A.A. (2006). Cell division. *WormBook* : the online review of C  
951 *elegans* biology, 1-40.
- 952 Ou, G., Stuurman, N., D'Ambrosio, M., and Vale, R.D. (2010). Polarized myosin produces  
953 unequal-size daughters during asymmetric cell division. *Science* 330, 677-680.
- 954 Ou, G.S., Gentili, C., and Gonczy, P. (2014). Stereotyped distribution of midbody remnants in  
955 early C. *elegans* embryos requires cell death genes and is dispensable for development. *Cell*  
956 *Res* 24, 251-253.
- 957 Padmanabhan, A., and Zaidel-Bar, R. (2017). Non-junctional E-Cadherin Clusters Regulate  
958 the Actomyosin Cortex in the C. *elegans* Zygote. *Mech Develop* 145, S85-S85.
- 959 Paolini, A., Duchemin, A.L., Albadi, S., Patzel, E., Bornhorst, D., Avalos, P.G., Lemke, S.,  
960 Machate, A., Brand, M., Sel, S., *et al.* (2015). Asymmetric inheritance of the apical domain  
961 and self-renewal of retinal ganglion cell progenitors depend on Anillin function. *Development*  
962 142, 832-839.
- 963 Perkins, L.A., Hedgecock, E.M., Thomson, J.N., and Culotti, J.G. (1986). Mutant Sensory  
964 Cilia in the Nematode *Caenorhabditis-Elegans*. *Developmental Biology* 117, 456-487.

- 965 Pohl, C., and Bao, Z. (2010). Chiral forces organize left-right patterning in *C. elegans* by  
966 uncoupling midline and anteroposterior axis. *Dev Cell* *19*, 402-412.
- 967 Pollarolo, G., Schulz, J.G., Munck, S., and Dotti, C.G. (2011). Cytokinesis remnants define  
968 first neuronal asymmetry in vivo. *Nat Neurosci* *14*, 1525-1533.
- 969 Portereiko, M.F., Saam, J., and Mango, S.E. (2004). ZEN-4/MKLP1 is required to polarize  
970 the foregut epithelium. *Curr Biol* *14*, 932-941.
- 971 Rasmussen, J.P., Feldman, J.L., Reddy, S.S., and Priess, J.R. (2013). Cell Interactions and  
972 Patterned Intercalations Shape and Link Epithelial Tubes in *C. elegans*. *Plos Genetics* *9*.
- 973 Rasmussen, J.P., Reddy, S.S., and Priess, J.R. (2012). Laminin is required to orient epithelial  
974 polarity in the *C. elegans* pharynx. *Development* *139*, 2050-2060.
- 975 Reinsch, S., and Karsenti, E. (1994). Orientation of Spindle Axis and Distribution of Plasma-  
976 Membrane Proteins during Cell-Division in Polarized Mdkkii Cells. *J Cell Biol* *126*, 1509-  
977 1526.
- 978 Salzmann, V., Chen, C., Chiang, C.Y., Tiyaonchai, A., Mayer, M., and Yamashita, Y.M.  
979 (2014). Centrosome-dependent asymmetric inheritance of the midbody ring in *Drosophila*  
980 germline stem cell division. *Mol Biol Cell* *25*, 267-275.
- 981 Sato, K., Norris, A., Sato, M., and Grant, B.D. (2014). *C. elegans* as a model for membrane  
982 traffic. *WormBook : the online review of C elegans biology*, 1-47.
- 983 Schiel, J.A., Childs, C., and Prekeris, R. (2013). Endocytic transport and cytokinesis: from  
984 regulation of the cytoskeleton to midbody inheritance. *Trends Cell Biol* *23*, 319-327.
- 985 Schiel, J.A., Park, K., Morphew, M.K., Reid, E., Hoenger, A., and Prekeris, R. (2011).  
986 Endocytic membrane fusion and buckling-induced microtubule severing mediate cell  
987 abscission. *J Cell Sci* *124*, 1411-1424.
- 988 Schindelin, J., Arganda-Carreras, I., Frise, E., Kaynig, V., Longair, M., Pietzsch, T.,  
989 Preibisch, S., Rueden, C., Saalfeld, S., Schmid, B., *et al.* (2012). Fiji: an open-source platform  
990 for biological-image analysis. *Nat Methods* *9*, 676-682.
- 991 Schluter, M.A., Pfarr, C.S., Pieczynski, J., Whiteman, E.L., Hurd, T.W., Fan, S.L., Liu, C.J.,  
992 and Margolis, B. (2009). Trafficking of Crumbs3 during Cytokinesis Is Crucial for Lumen  
993 Formation. *Mol Biol Cell* *20*, 4652-4663.
- 994 Schumacher, J.M., Golden, A., and Donovan, P.J. (1998). AIR-2: An Aurora/Ipl1-related  
995 protein kinase associated with chromosomes and midbody microtubules is required for polar  
996 body extrusion and cytokinesis in *Caenorhabditis elegans* embryos. *J Cell Biol* *143*, 1635-  
997 1646.
- 998 Severson, A.F., Hamill, D.R., Carter, J.C., Schumacher, J., and Bowerman, B. (2000). The  
999 Aurora-related kinase AIR-2 recruits ZEN-4/CeMKLP1 to the mitotic spindle at metaphase  
1000 and is required for cytokinesis. *Curr Biol* *10*, 1162-1171.
- 1001 Siller, K.H., and Doe, C.Q. (2009). Spindle orientation during asymmetric cell division. *Nat*  
1002 *Cell Biol* *11*, 365-374.
- 1003 Singh, D., and Pohl, C. (2014). Coupling of Rotational Cortical Flow, Asymmetric Midbody  
1004 Positioning, and Spindle Rotation Mediates Dorsoventral Axis Formation in *C. elegans*. *Dev*  
1005 *Cell* *28*, 253-267.
- 1006 Skop, A.R., Liu, H., Yates, J., 3rd, Meyer, B.J., and Heald, R. (2004). Dissection of the  
1007 mammalian midbody proteome reveals conserved cytokinesis mechanisms. *Science* *305*, 61-  
1008 66.
- 1009 Smith, K.P., Kieserman, E.K., Wang, P.I., Basten, S.G., Giles, R.H., Marcotte, E.M., and  
1010 Wallingford, J.B. (2011). A Role for Central Spindle Proteins in Cilia Structure and Function.  
1011 *Cytoskeleton* *68*, 112-124.
- 1012 Steigemann, P., Wurzenberger, C., Schmitz, M.H.A., Held, M., Guizetti, J., Maar, S., and  
1013 Gerlich, D.W. (2009). Aurora B-Mediated Abscission Checkpoint Protects against  
1014 Tetraploidization. *Cell* *136*, 473-484.
- 1015 Sulston, J.E., Schierenberg, E., White, J.G., and Thomson, J.N. (1983). The embryonic cell  
1016 lineage of the nematode *Caenorhabditis elegans*. *Dev Biol* *100*, 64-119.
- 1017 Tong, Y.G., and Burglin, T.R. (2010). Conditions for dye-filling of sensory neurons in  
1018 *Caenorhabditis elegans*. *J Neurosci Meth* *188*, 58-61.

- 1019 van Furden, D., Johnson, K., Segbert, C., and Bossinger, O. (2004). The C-elegans ezrin-  
1020 radixin-moesin protein ERM-1 is necessary for apical junction remodelling and tubulogenesis  
1021 in the intestine. *Developmental Biology* 272, 262-276.
- 1022 Von Stetina, S.E., Liang, J., Marnellos, G., and Mango, S.E. (2017). Temporal regulation of  
1023 epithelium formation mediated by FoxA, MKLP1, MgcRacGAP, and PAR-6. *Mol Biol Cell*  
1024 28, 2042-2065.
- 1025 Waddle, J.A., Cooper, J.A., and Waterston, R.H. (1994). Transient localized accumulation of  
1026 actin in *Caenorhabditis elegans* blastomeres with oriented asymmetric divisions.  
1027 *Development* 120, 2317-2328.
- 1028 Wang, J., Silva, M., Haas, L.A., Morsci, N.S., Nguyen, K.C.Q., Hall, D.H., and Barr, M.M.  
1029 (2014a). C-elegans Ciliated Sensory Neurons Release Extracellular Vesicles that Function in  
1030 Animal Communication. *Curr Biol* 24, 519-525.
- 1031 Wang, T., Yanger, K., Stanger, B.Z., Cassio, D., and Bi, E. (2014b). Cytokinesis defines a  
1032 spatial landmark for hepatocyte polarization and apical lumen formation. *Journal of Cell*  
1033 *Science* 127, 2483-2492.
- 1034 Wilcock, A.C., Swedlow, J.R., and Storey, K.G. (2007). Mitotic spindle orientation  
1035 distinguishes stem cell and terminal modes of neuron production in the early spinal cord.  
1036 *Development* 134, 1943-1954.
- 1037 Yang, R.Z., and Feldman, J.L. (2015). SPD-2/CEP192 and CDK Are Limiting for  
1038 Microtubule-Organizing Center Function at the Centrosome. *Curr Biol* 25, 1924-1931.
- 1039 Zenker, J., White, M.D., Templin, R.M., Parton, R.G., Thorn-Seshold, O., Bissiere, S., and  
1040 Plachta, N. (2017). A microtubule-organizing center directing intracellular transport in the  
1041 early mouse embryo. *Science* 357, 925-+.

Figure 1

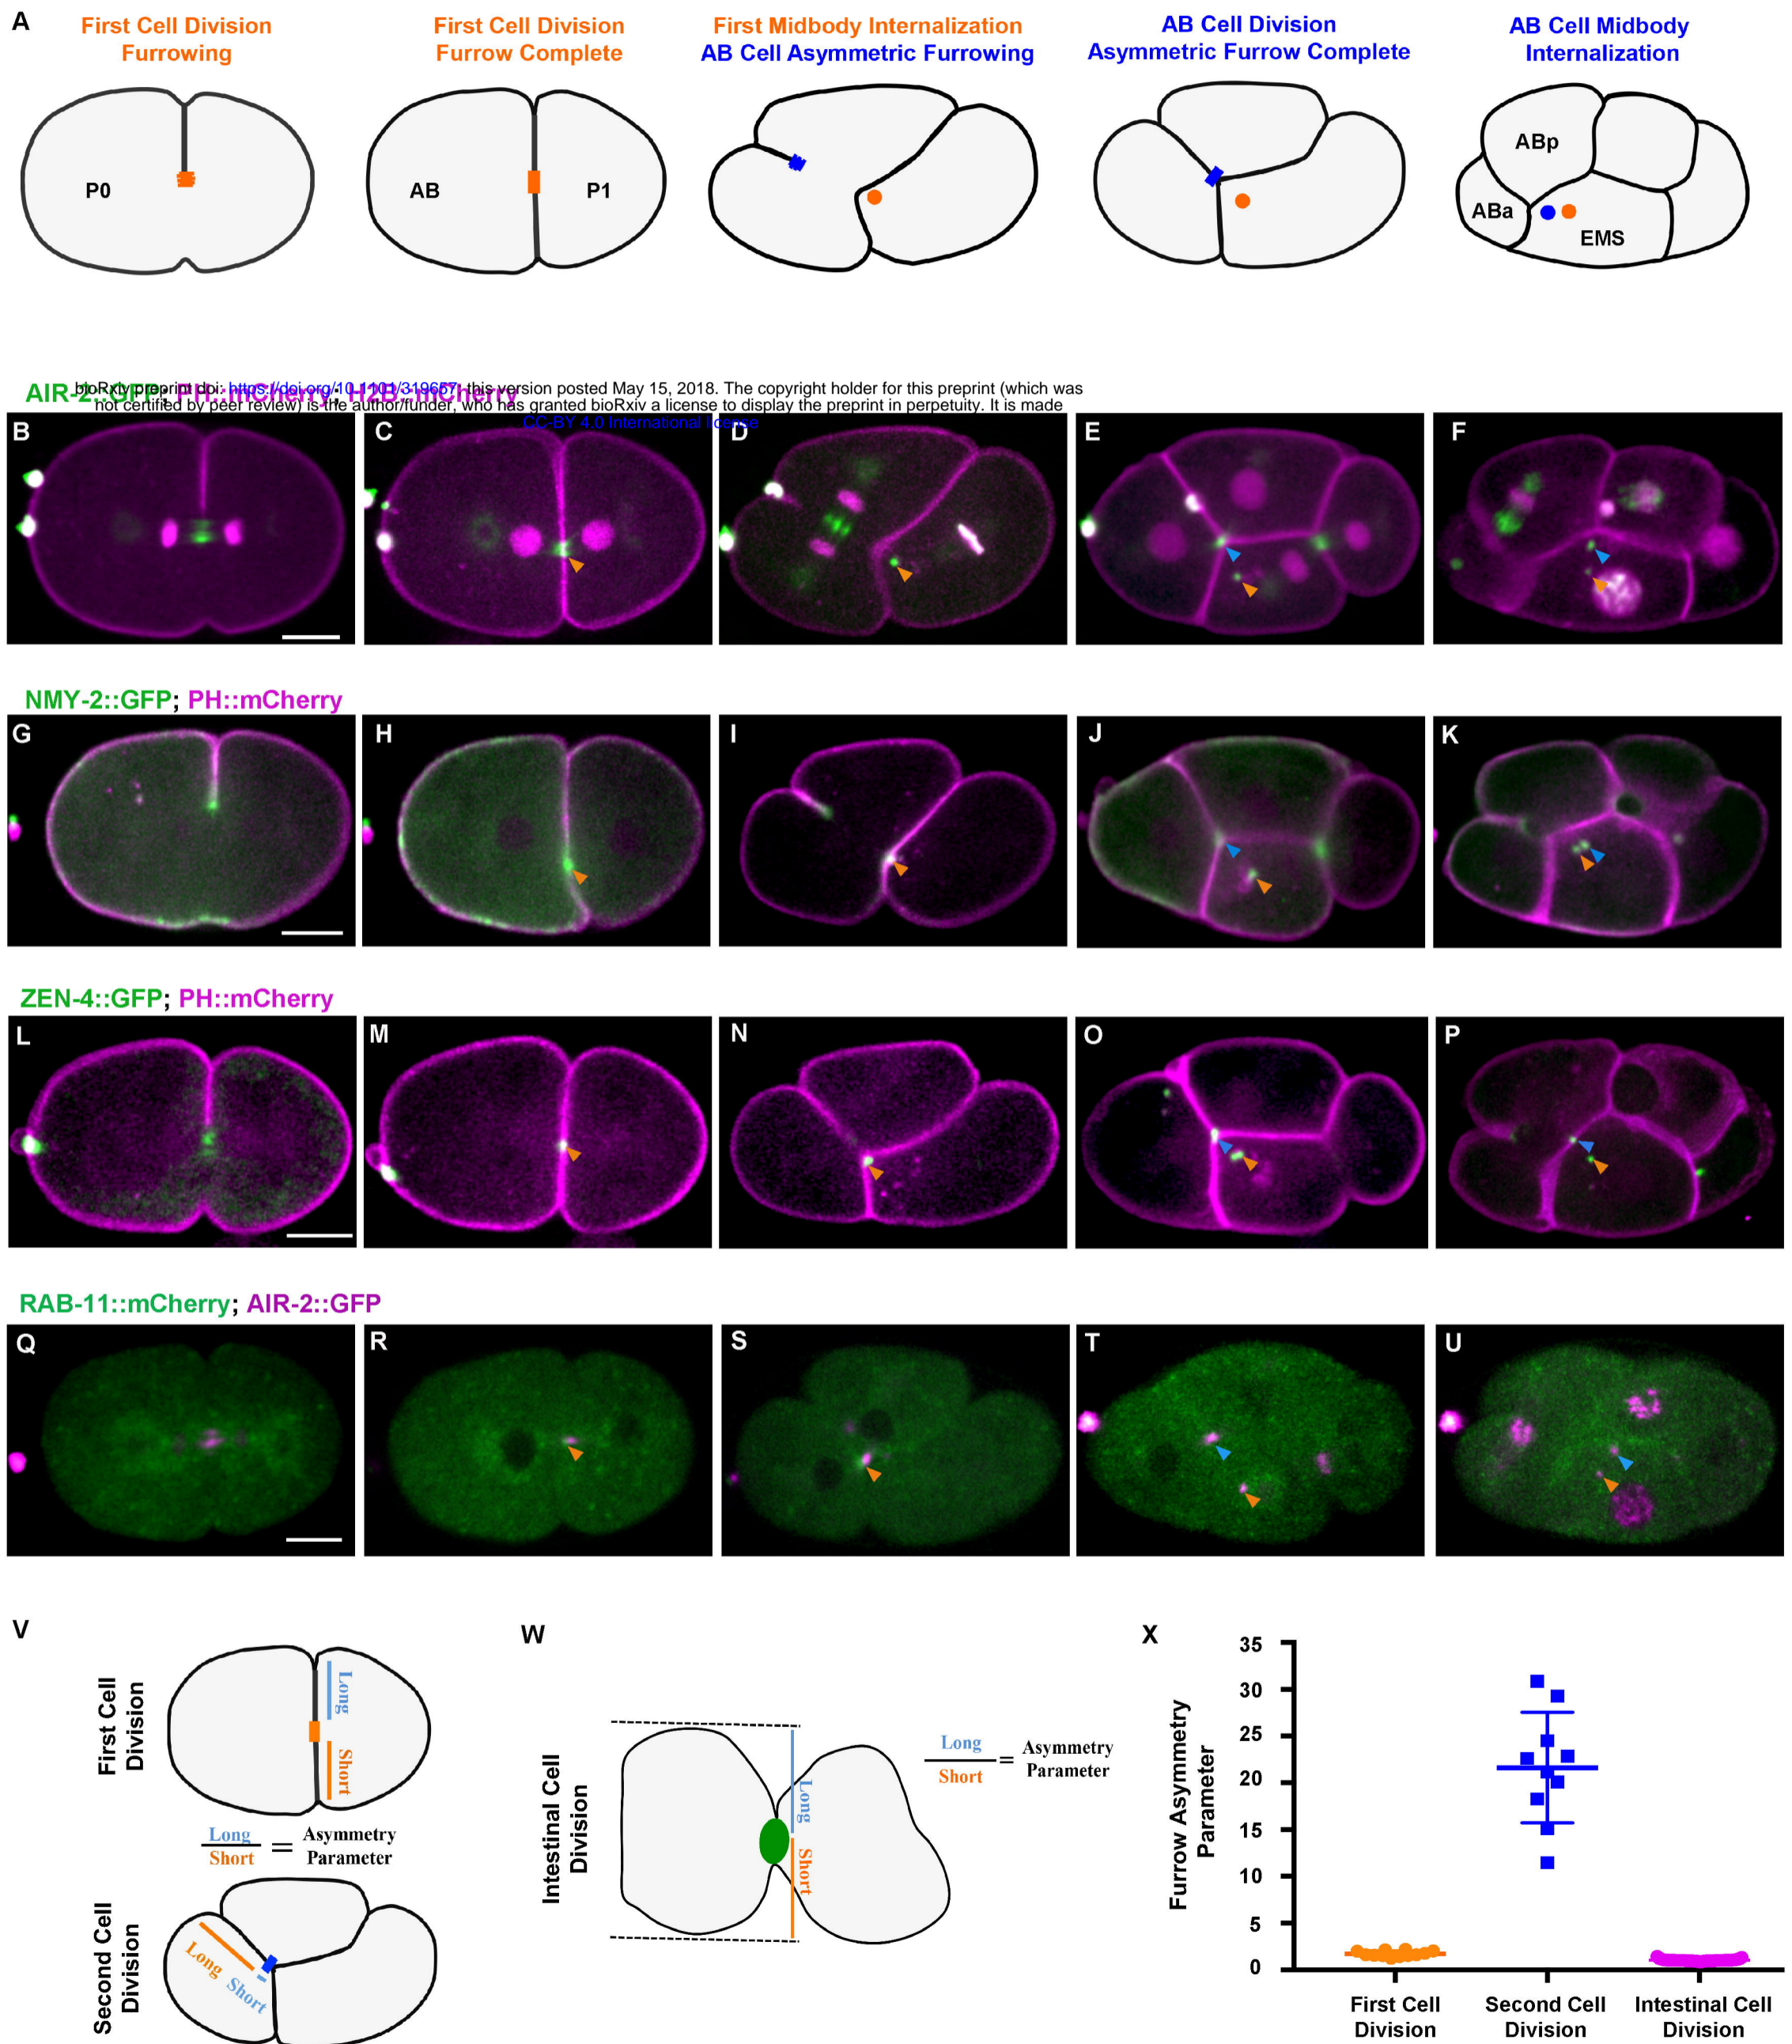

Figure 2

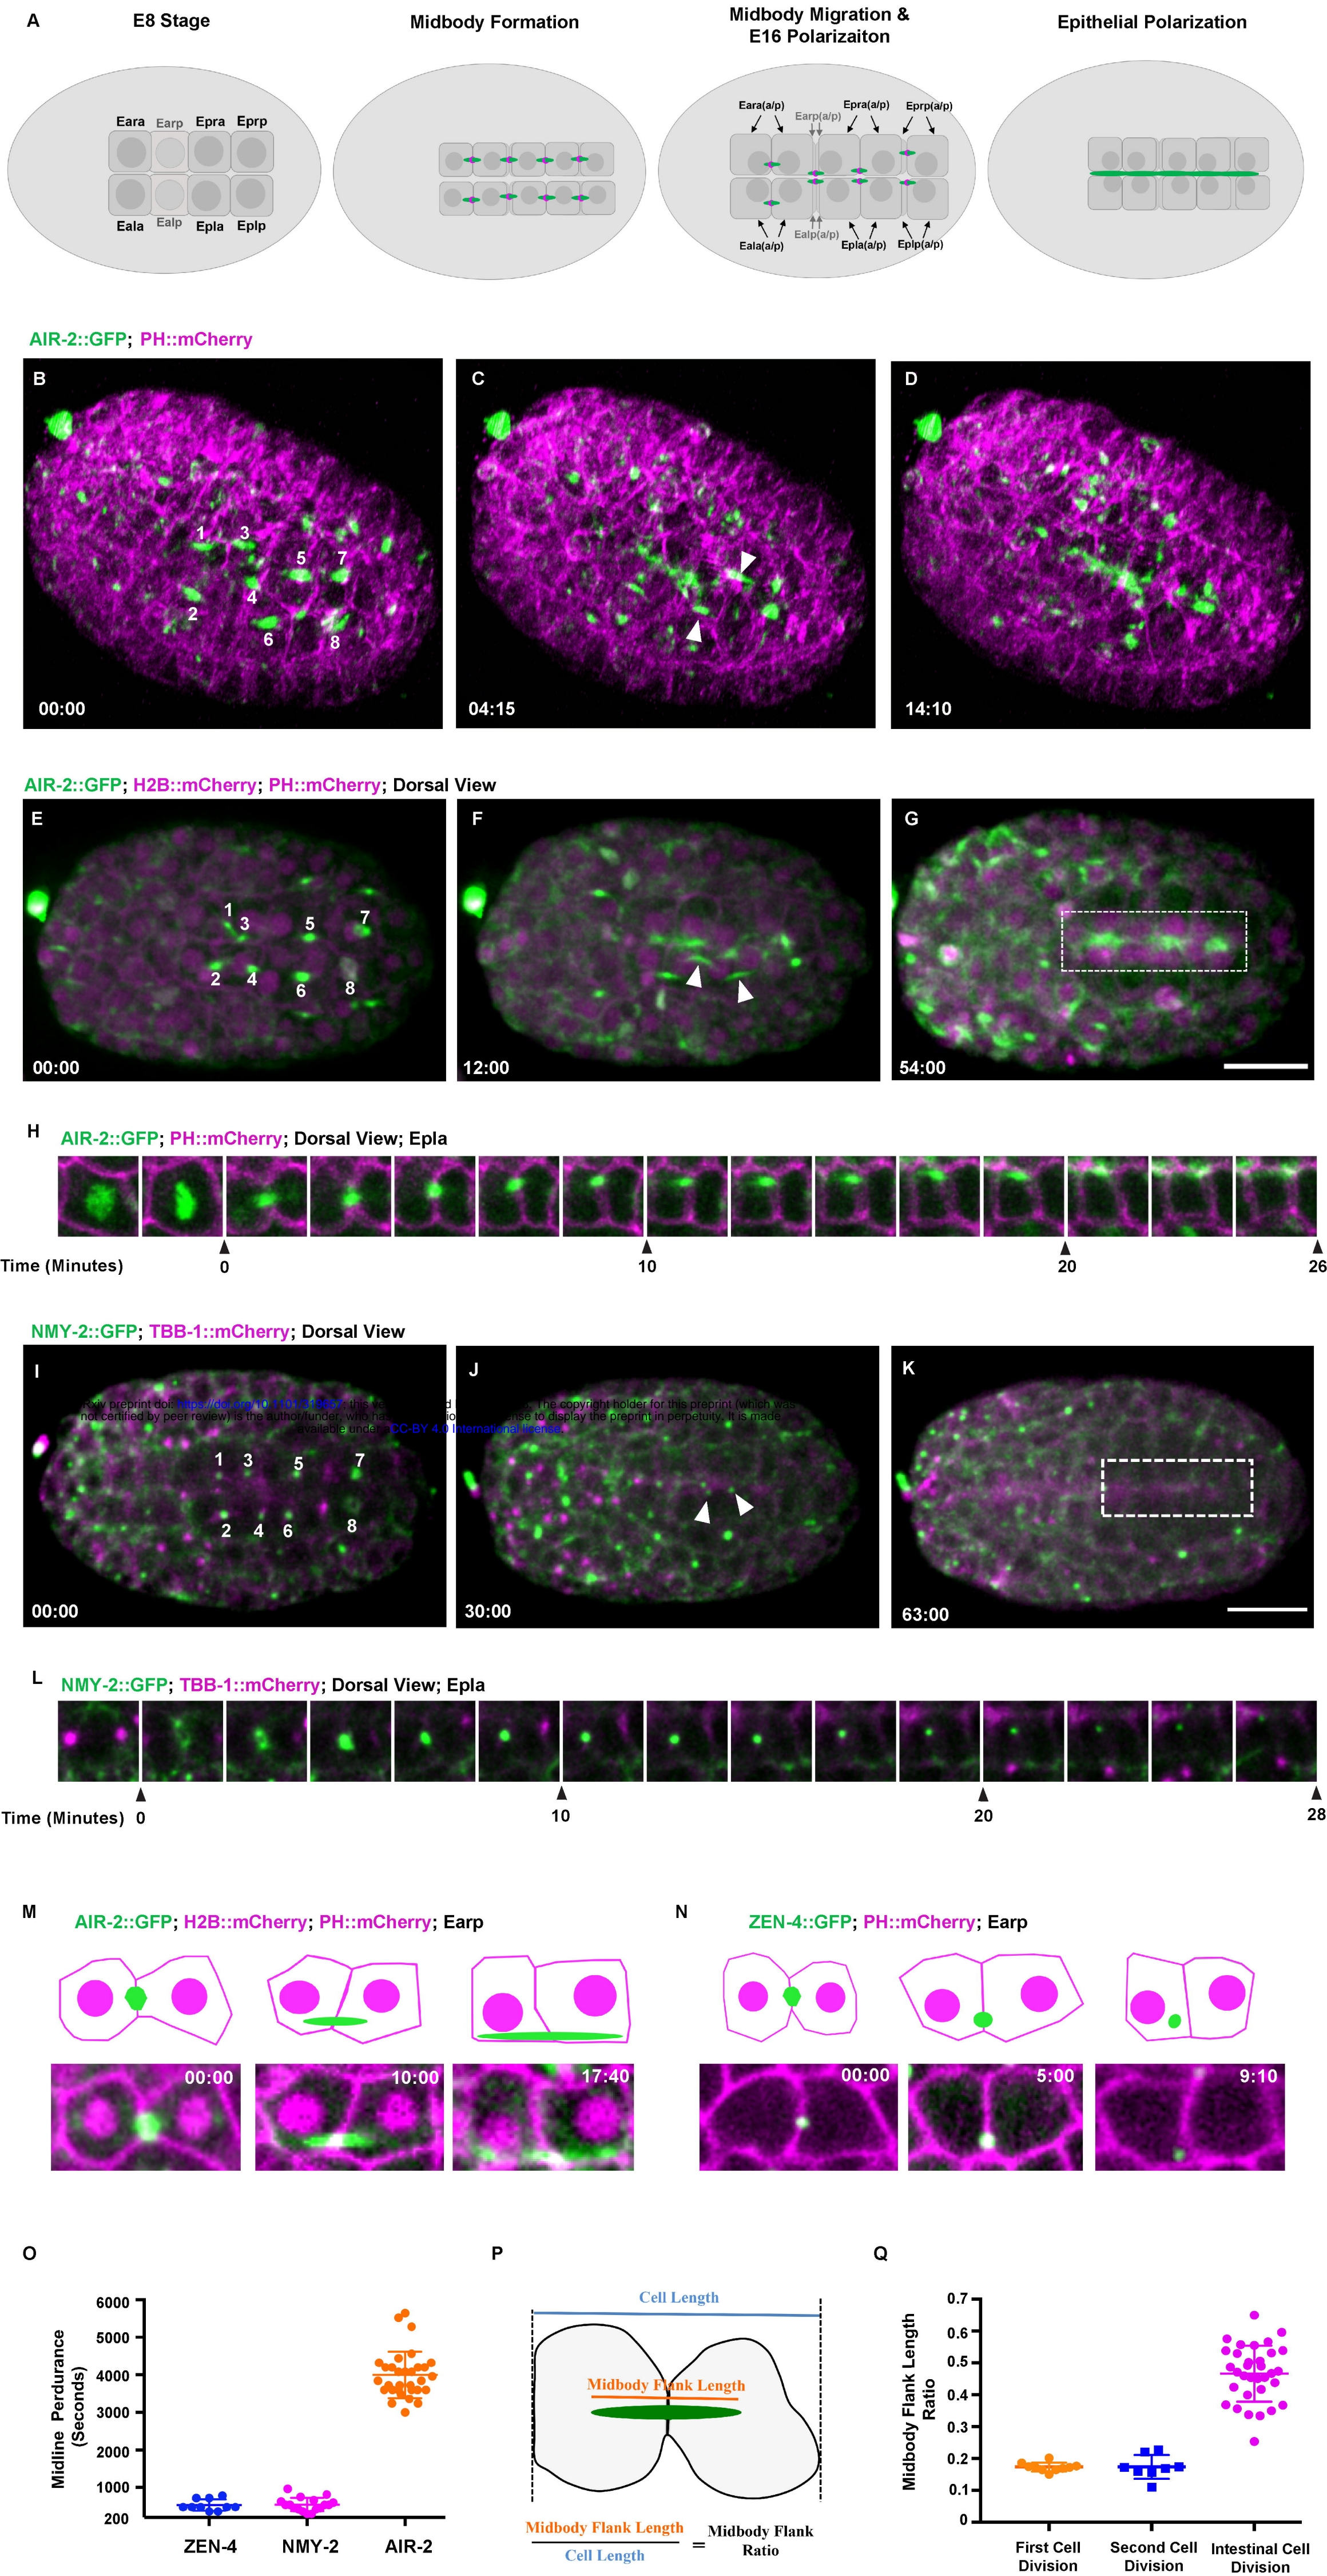

Figure 3

AIR-2::GFP; TBB-1::mCherry

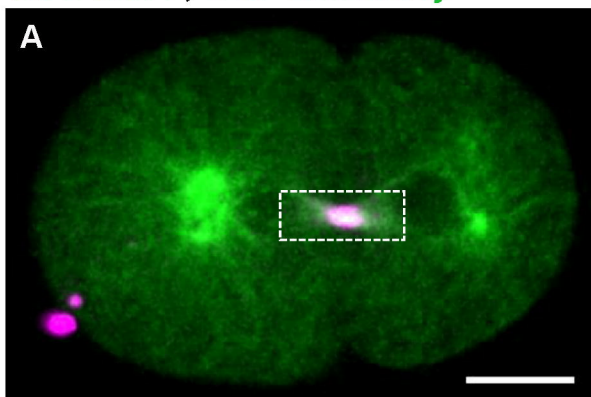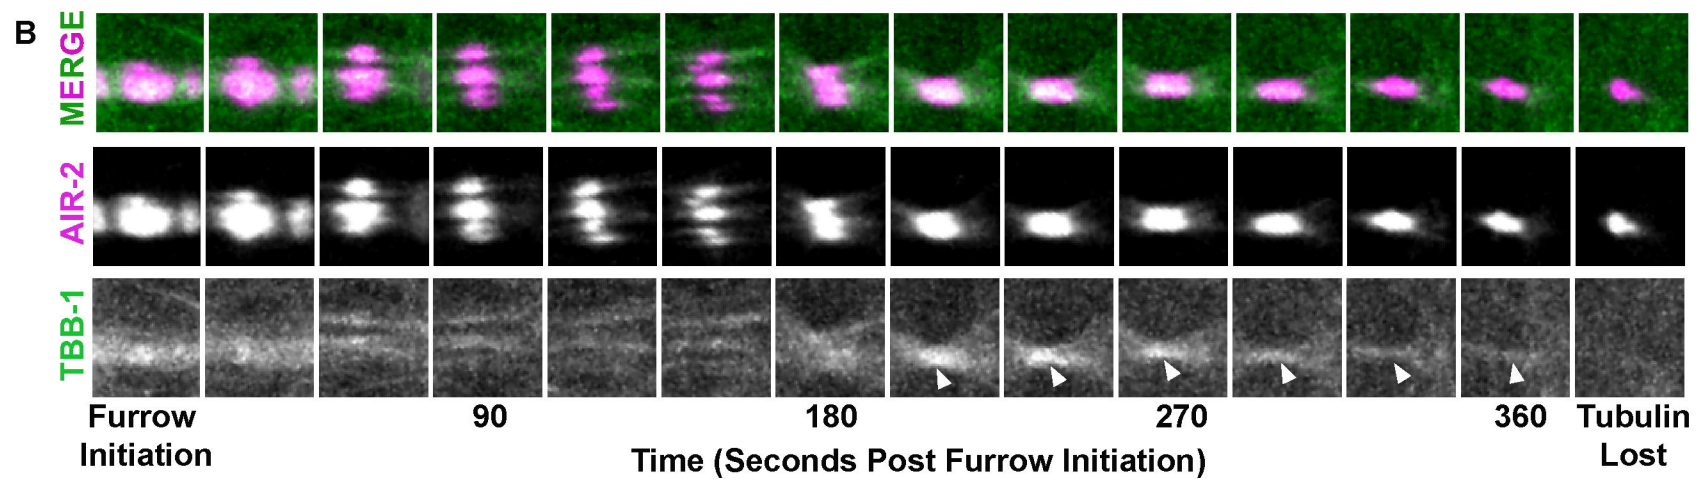

bioRxiv preprint doi: <https://doi.org/10.1101/319657>; this version posted May 15, 2018. The copyright holder for this preprint (which was not certified by peer review) is the author/funder, who has granted bioRxiv a license to display the preprint in perpetuity. It is made available under aCC-BY 4.0 International license.

AIR-2::GFP; TBB-1::mCherry

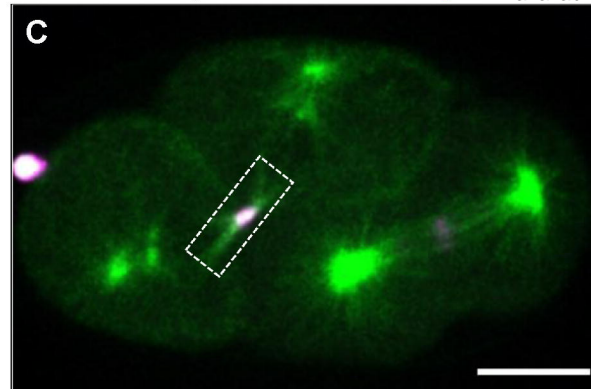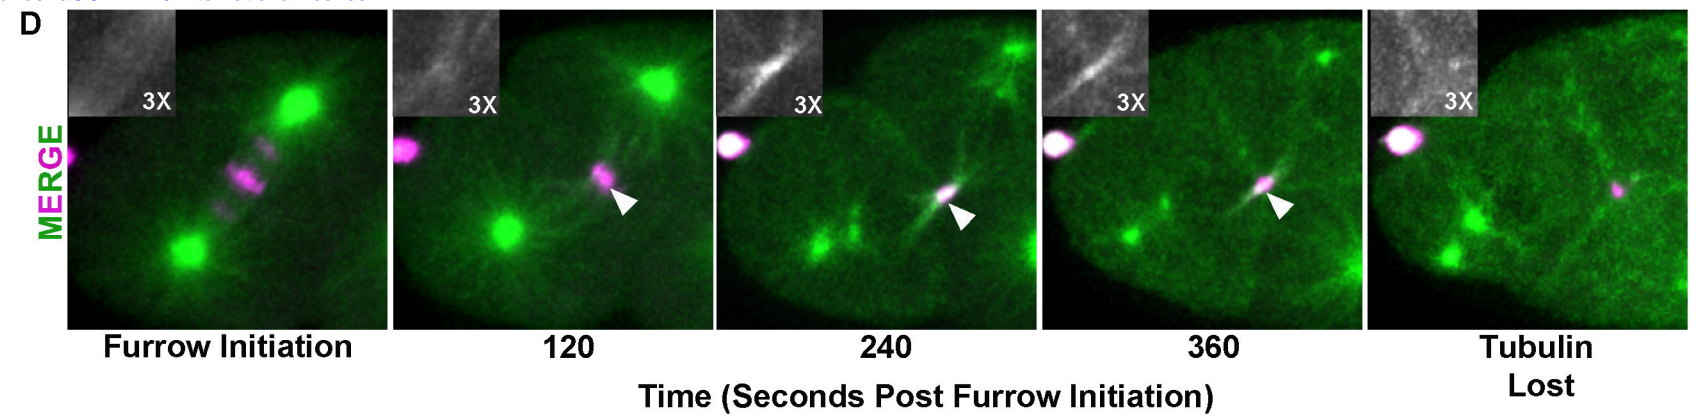

AIR-2::GFP; TBB-1::mCherry

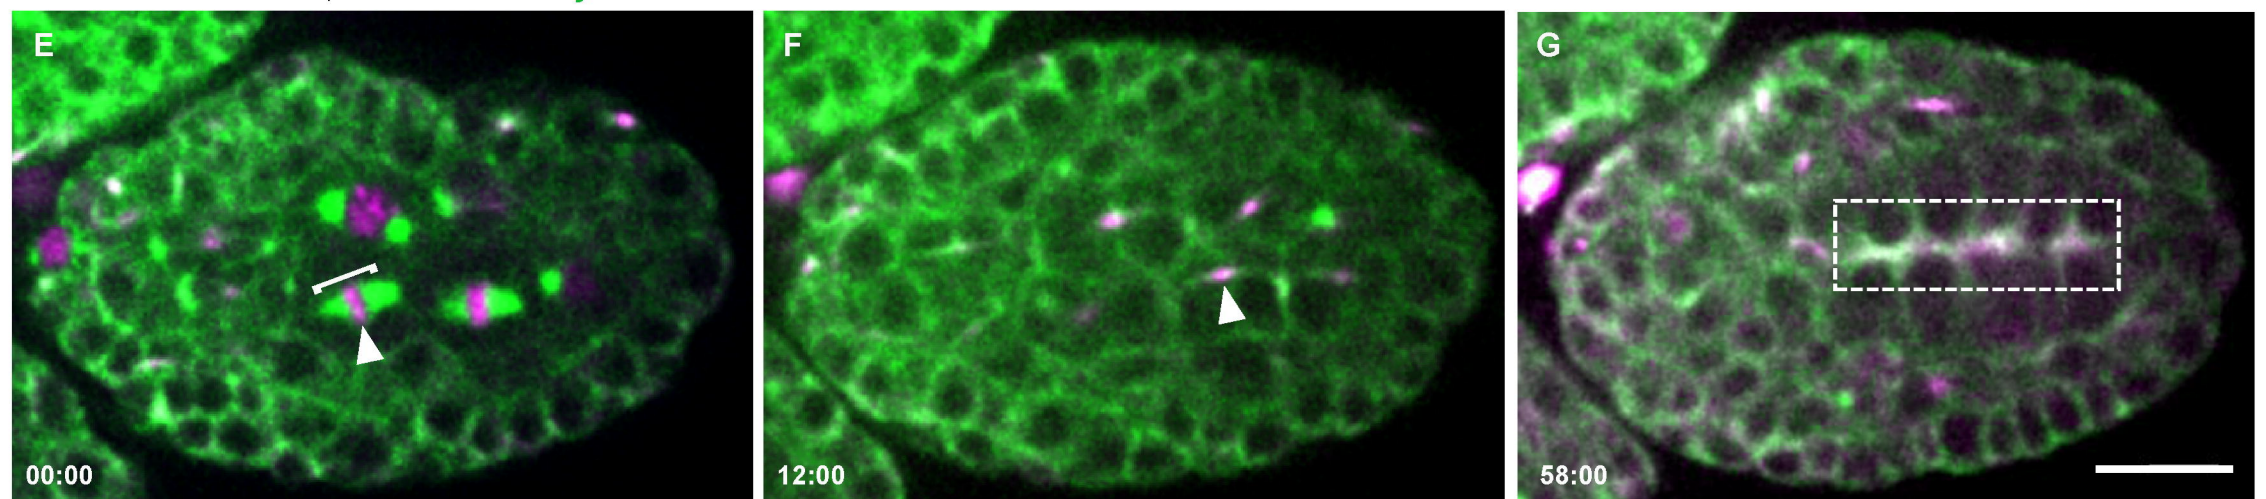

TBB-1::GFP

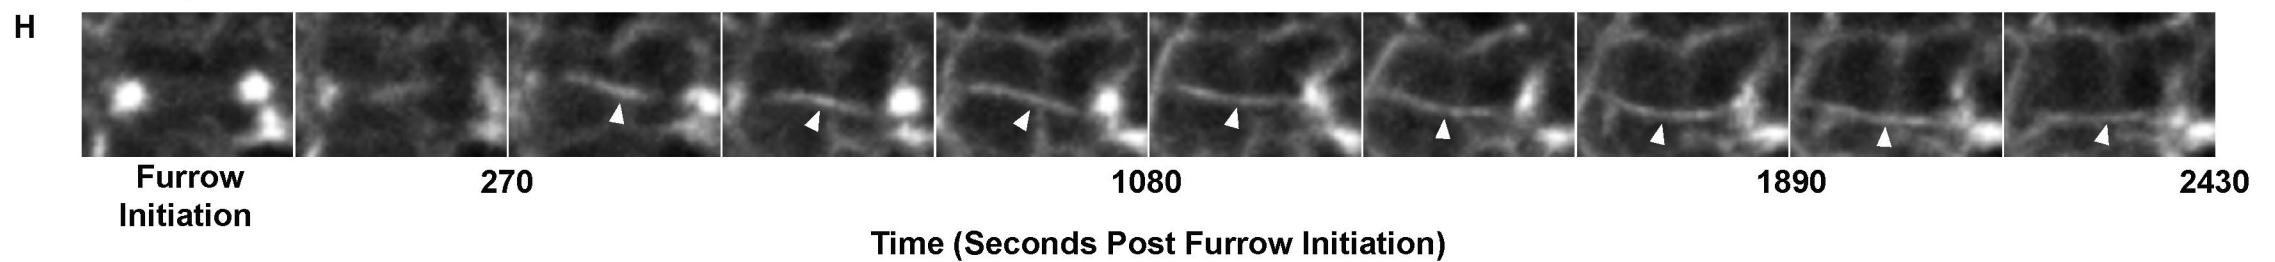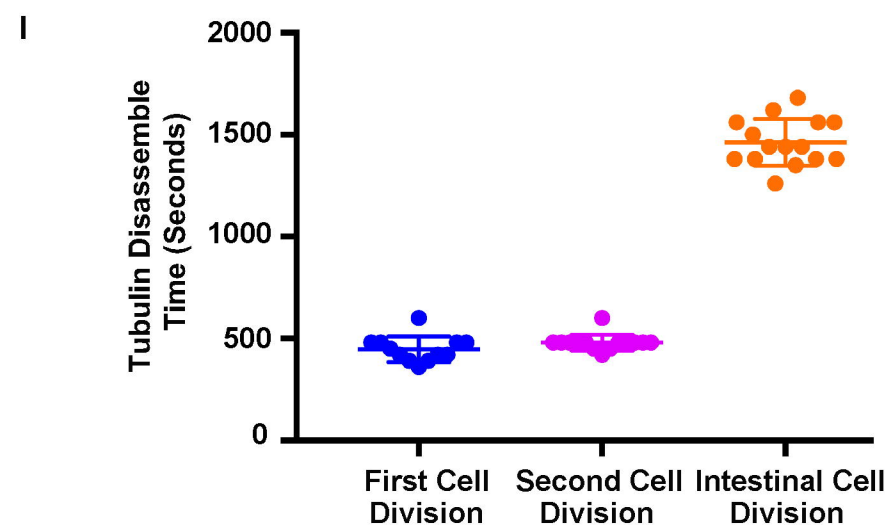

Figure 4

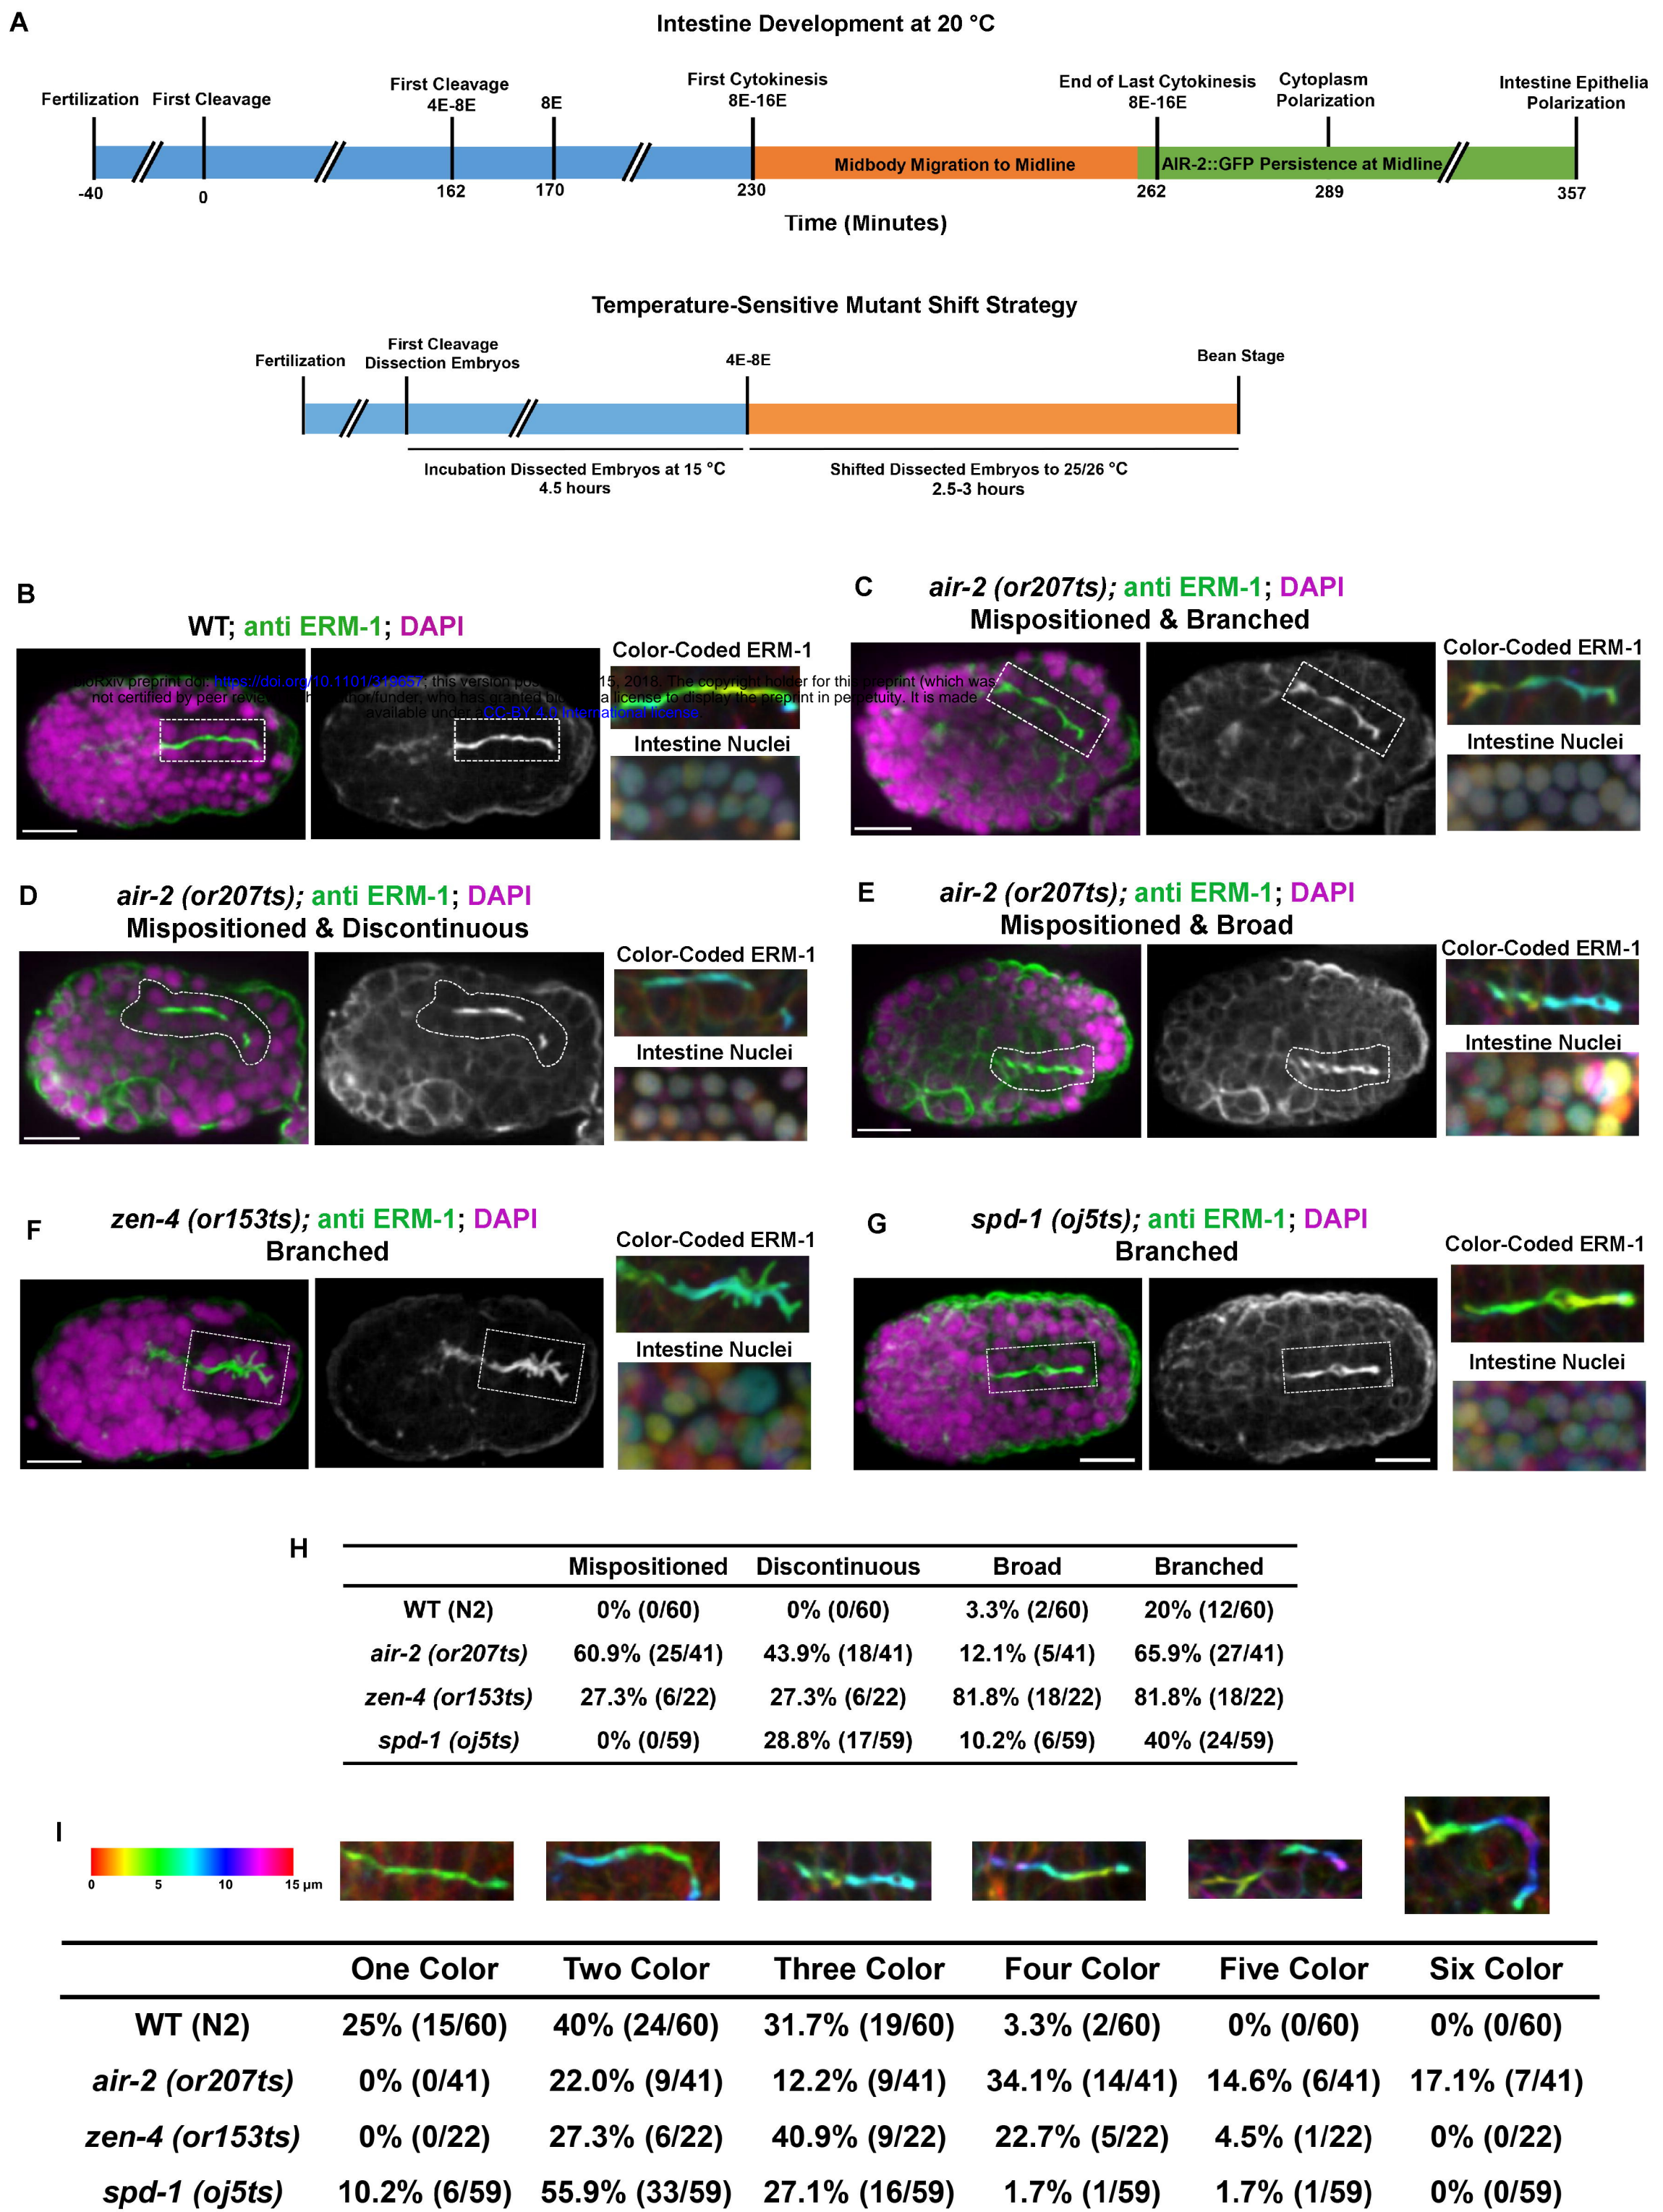

Figure 5

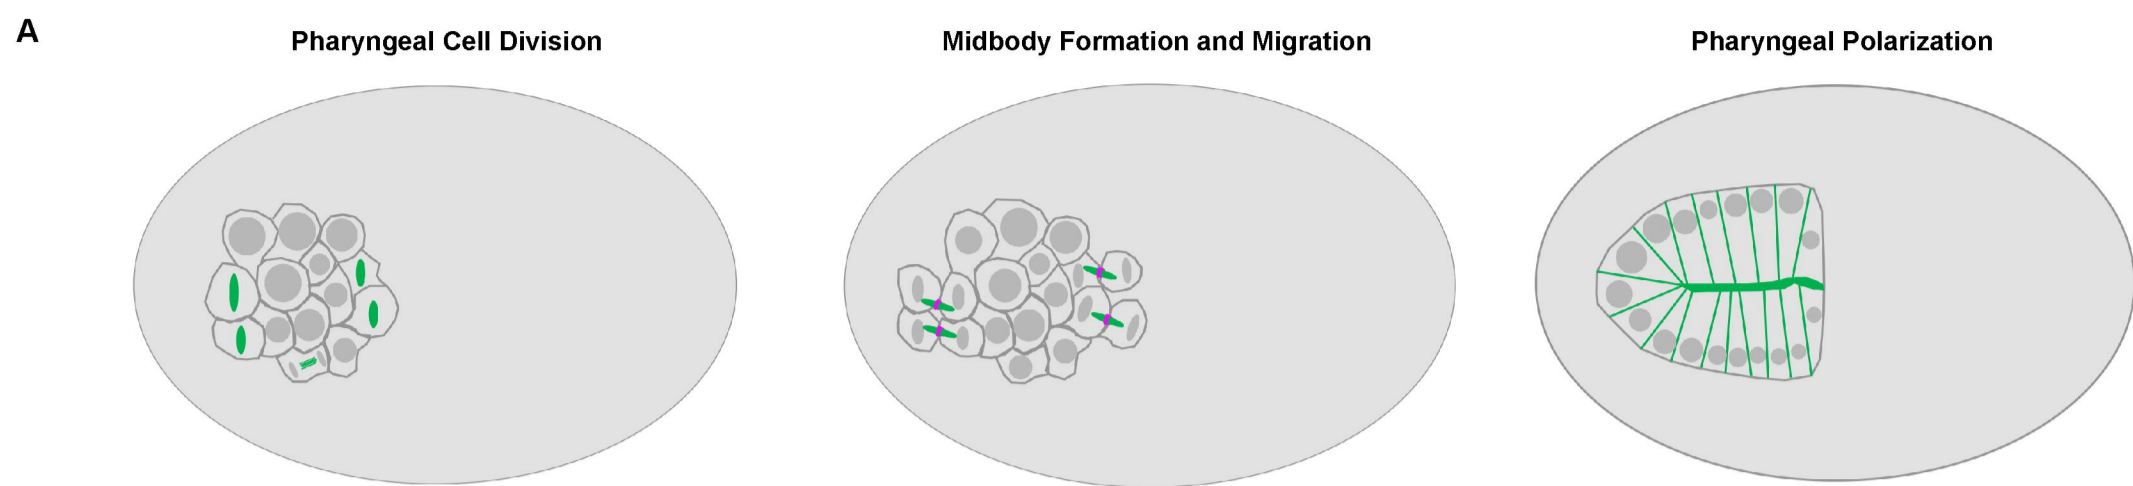

<https://doi.org/10.1101/319657>; this version posted May 15, 2018. The copyright holder for this preprint (which was not certified by peer review) is the author/funder, who has granted bioRxiv a license to display the preprint in perpetuity. It is made available under aCC-BY 4.0 International license.

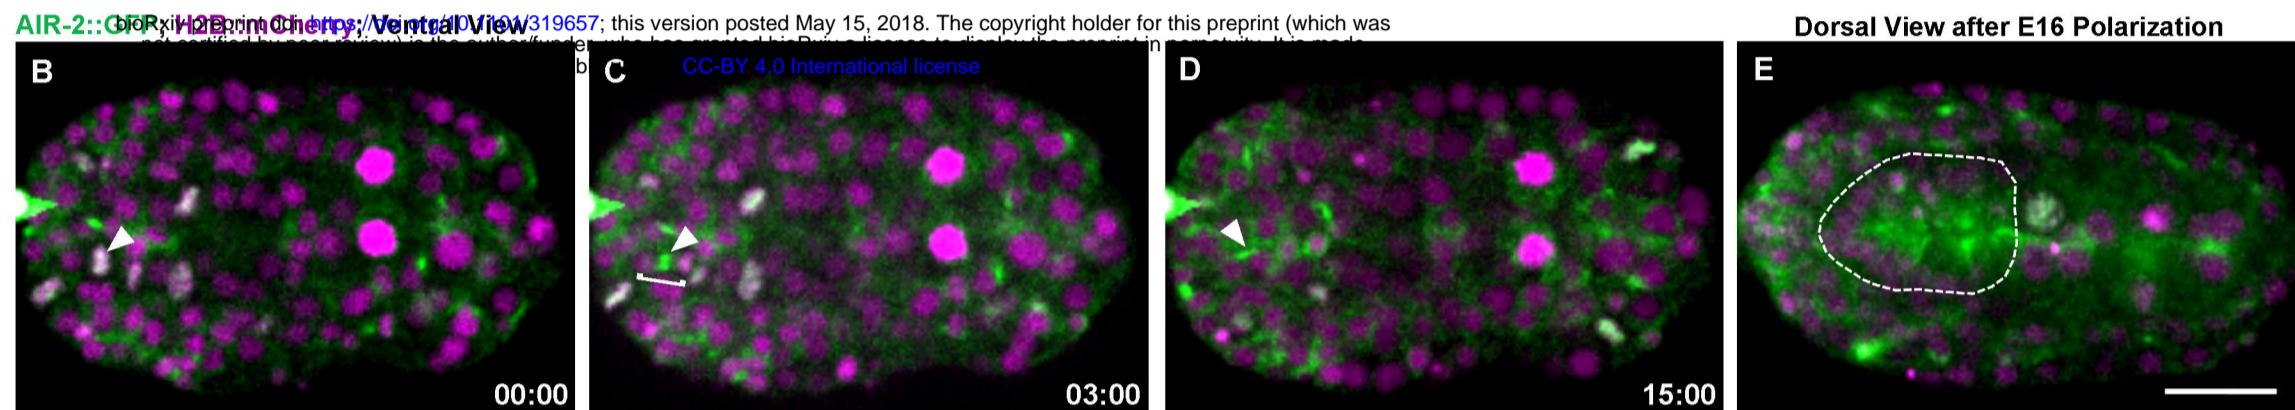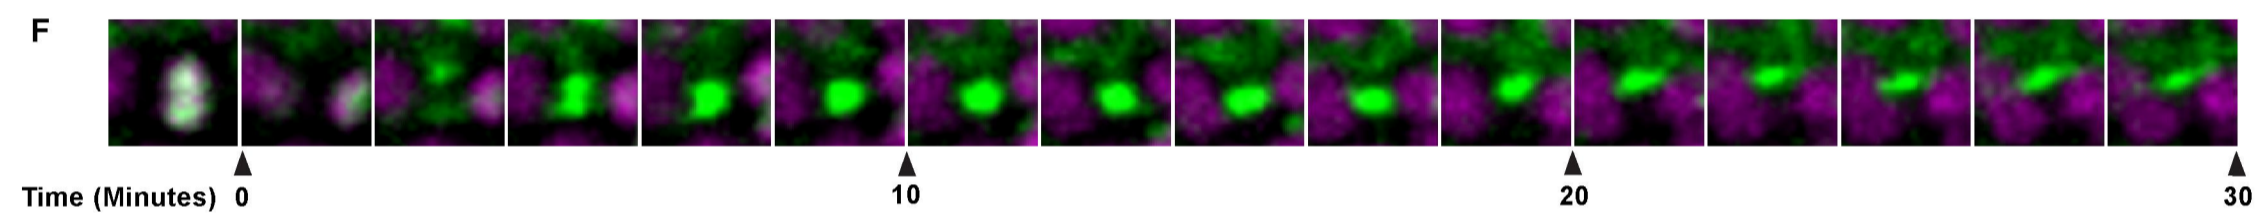

**ZEN-4::GFP; TBB-1::mCherry; Ventral View**

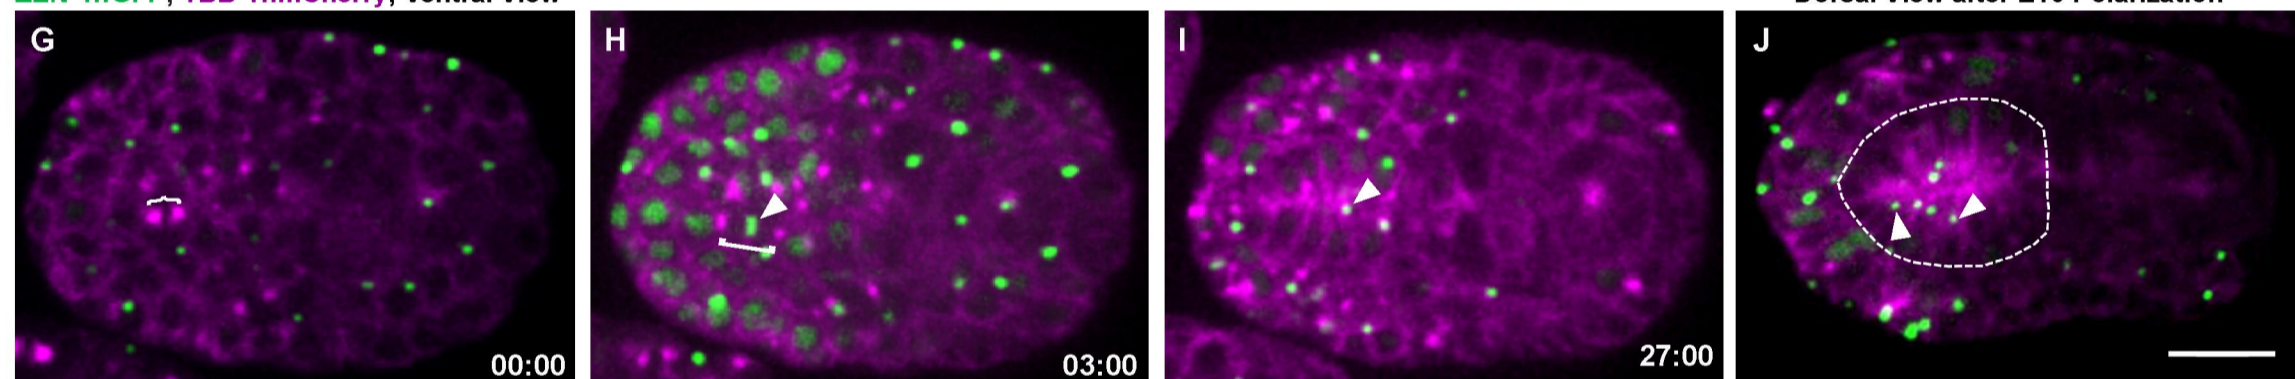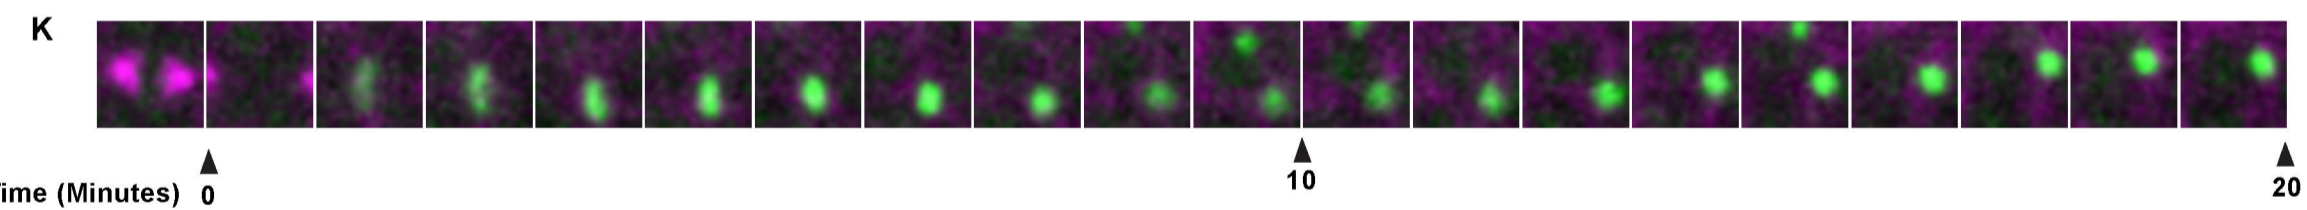

**NMY-2::GFP; TBB-1::mCherry; Ventral View**

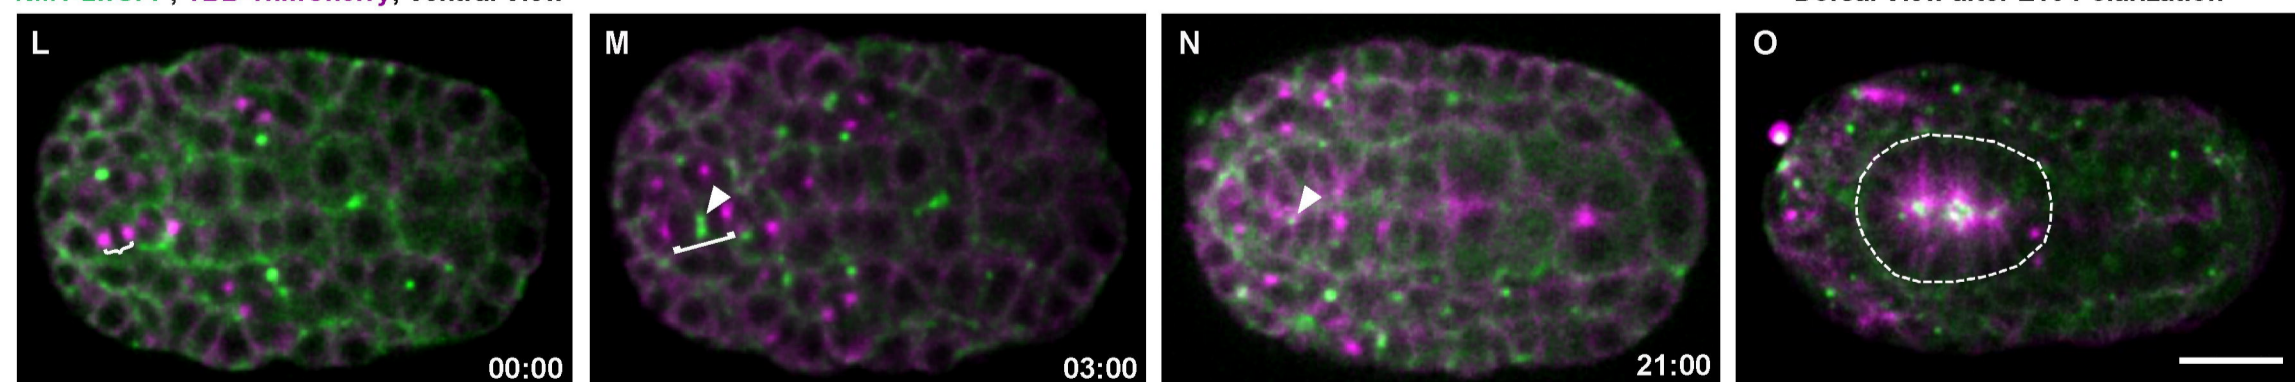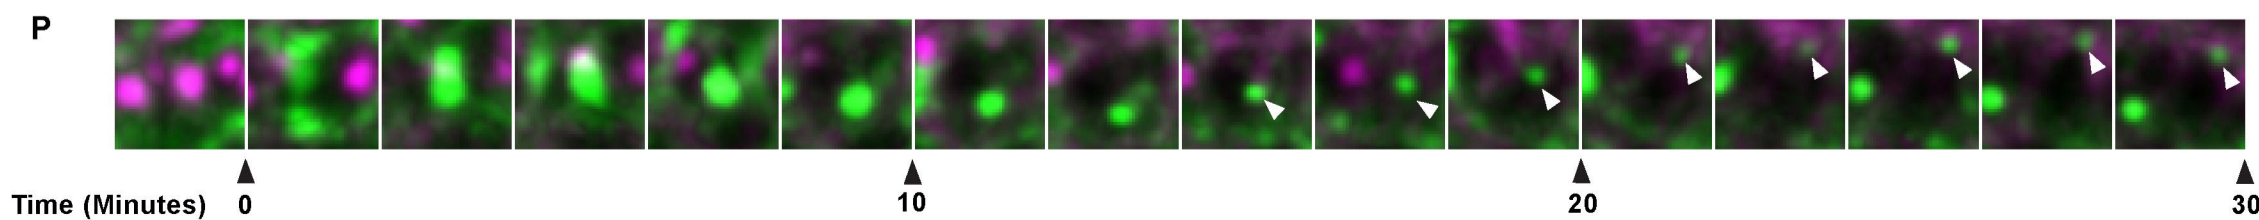



Figure 6

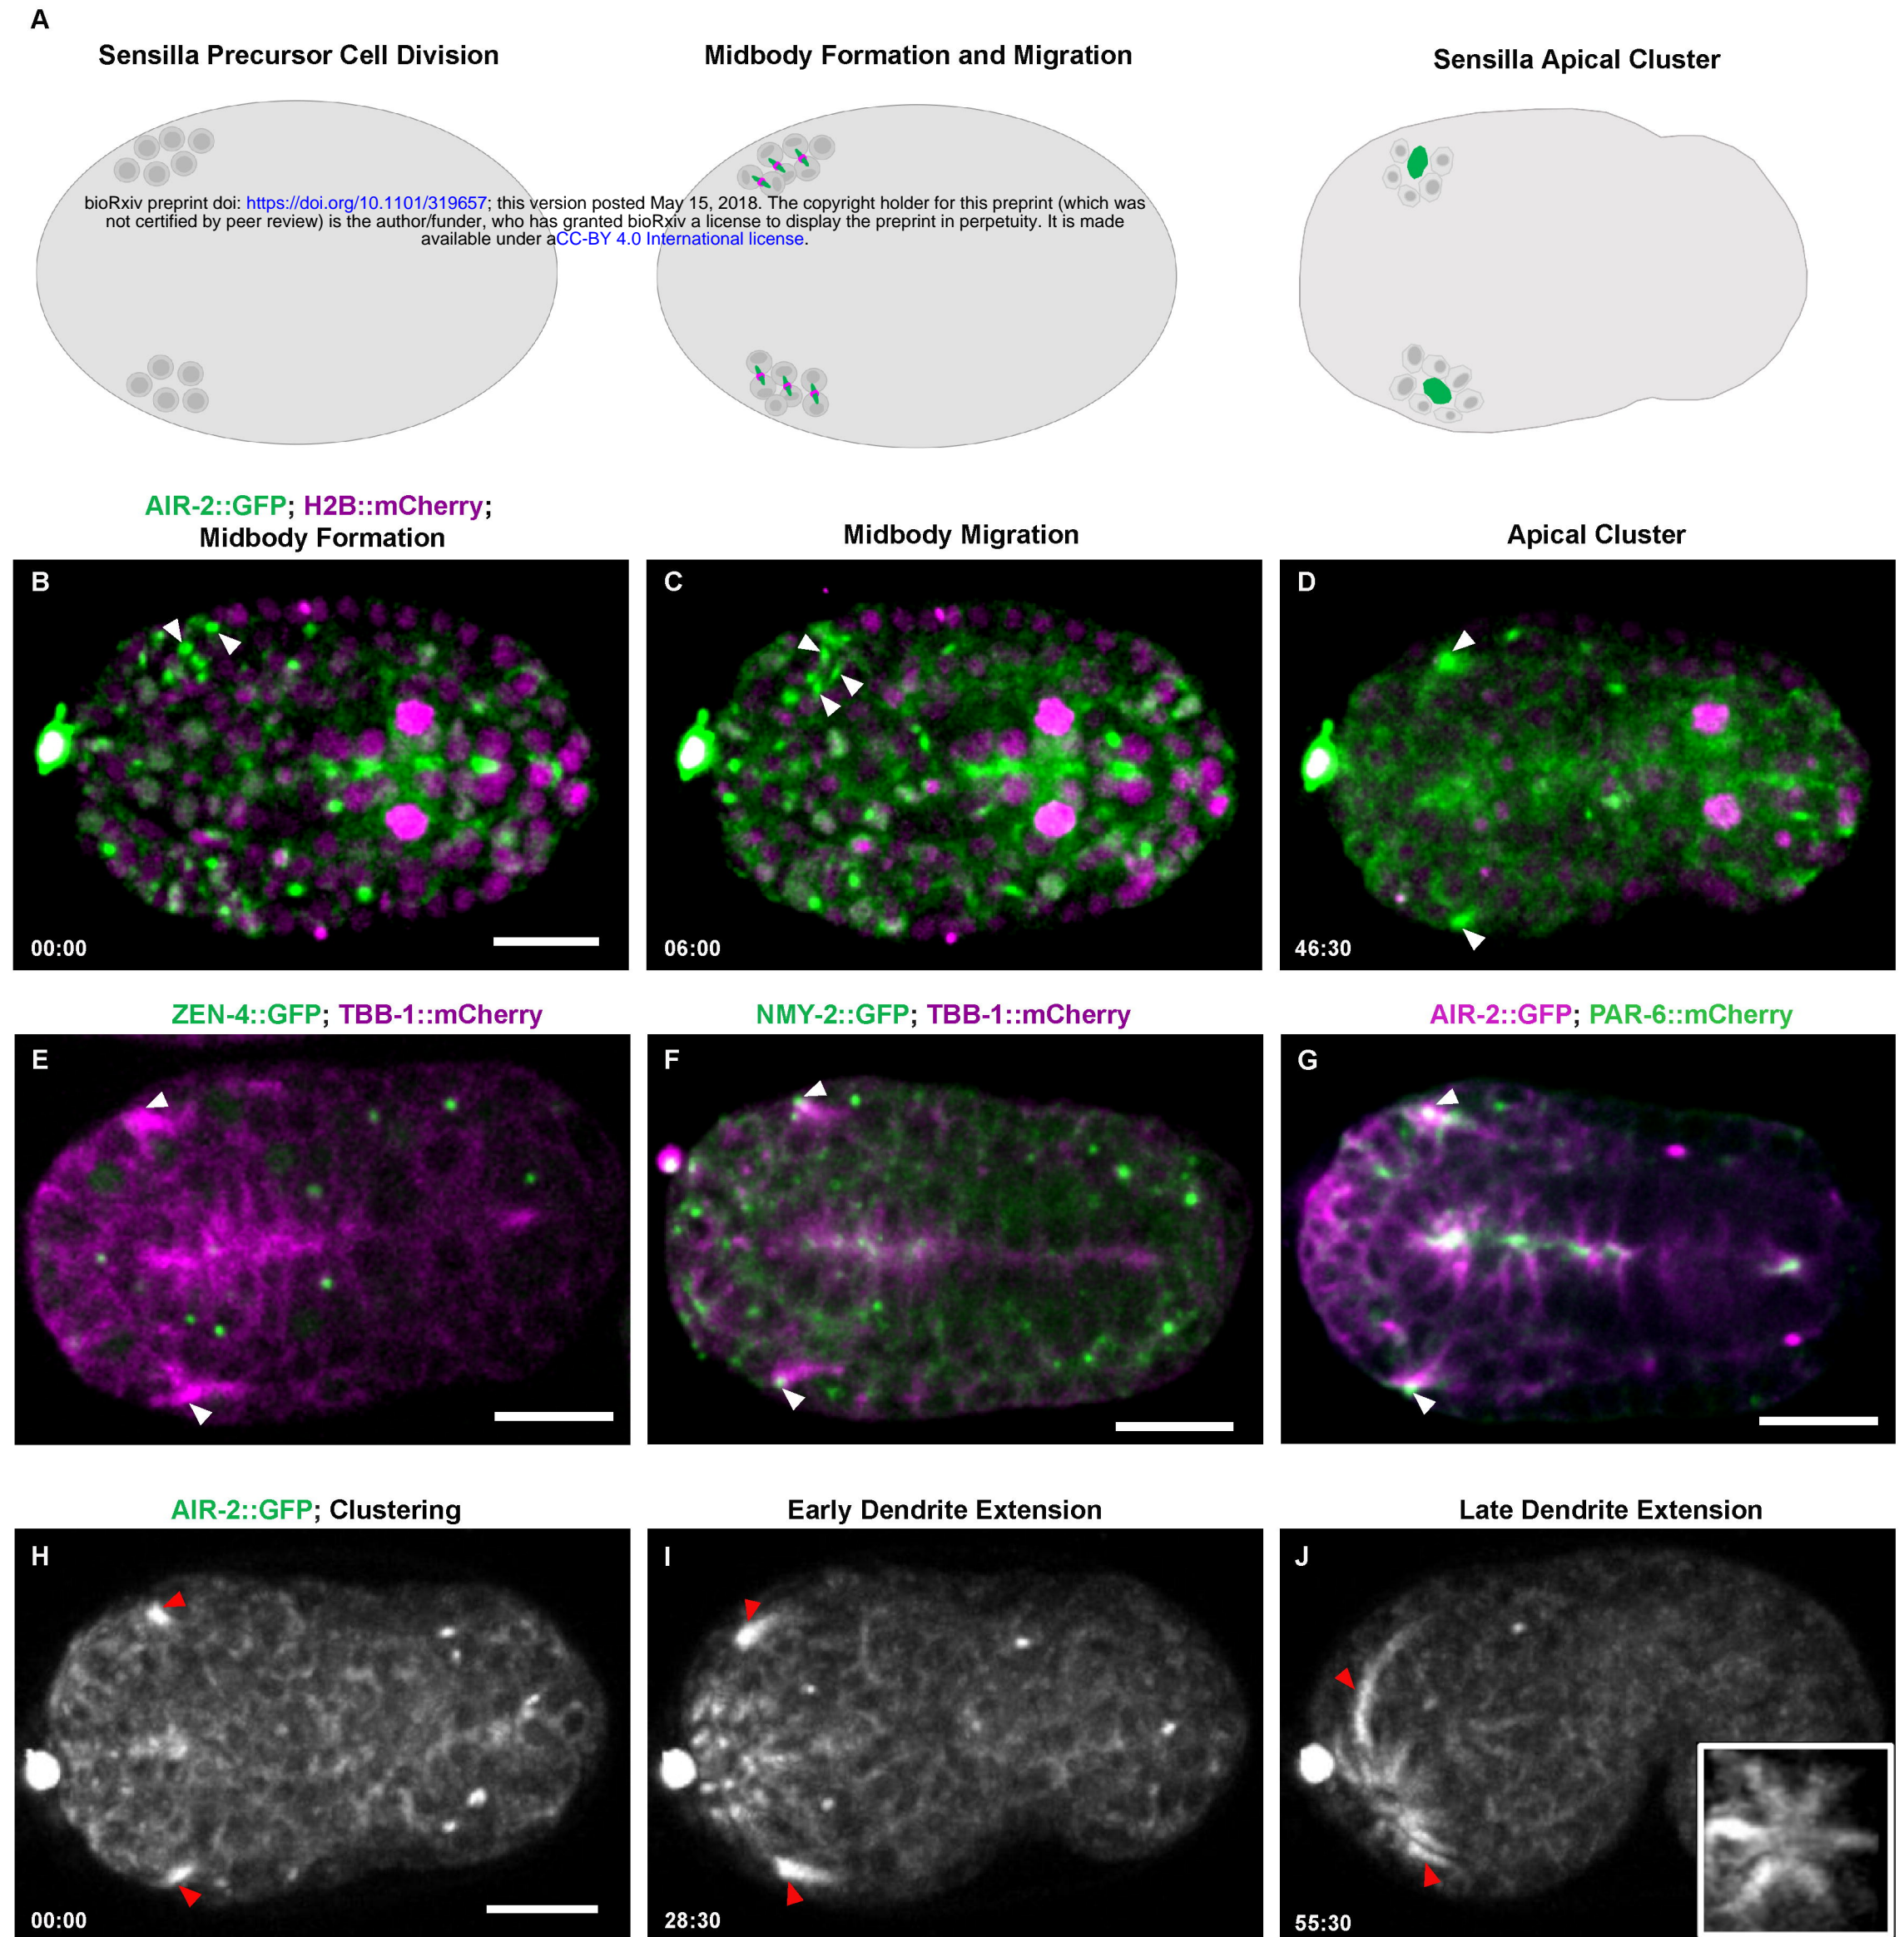

Figure 7

**WT; Dil staining**

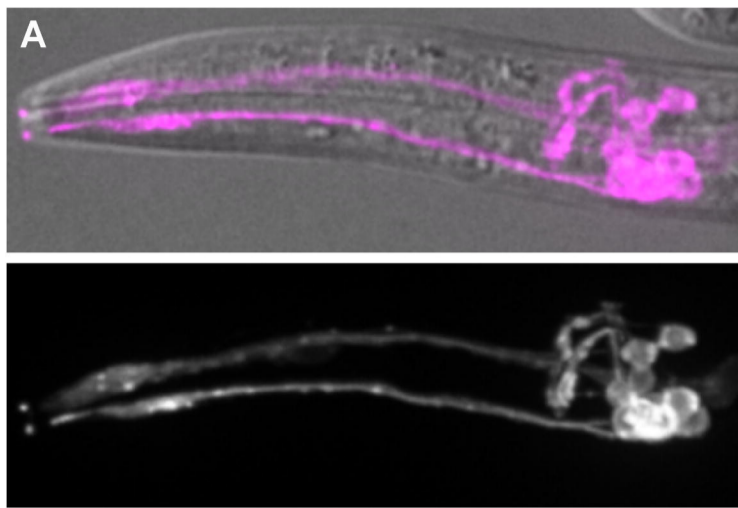

***air-2 (or207ts); Dil staining***  
**No Dil Singal**

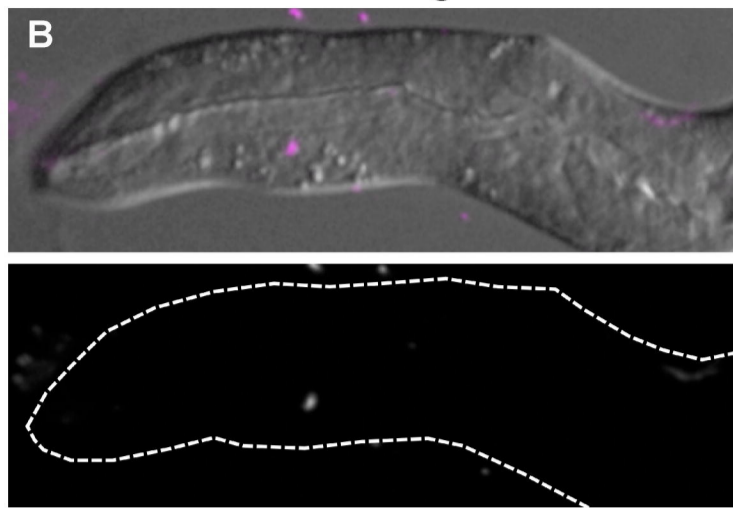

***air-2 (or207ts); Dil staining***  
**Weak Dil Singal**

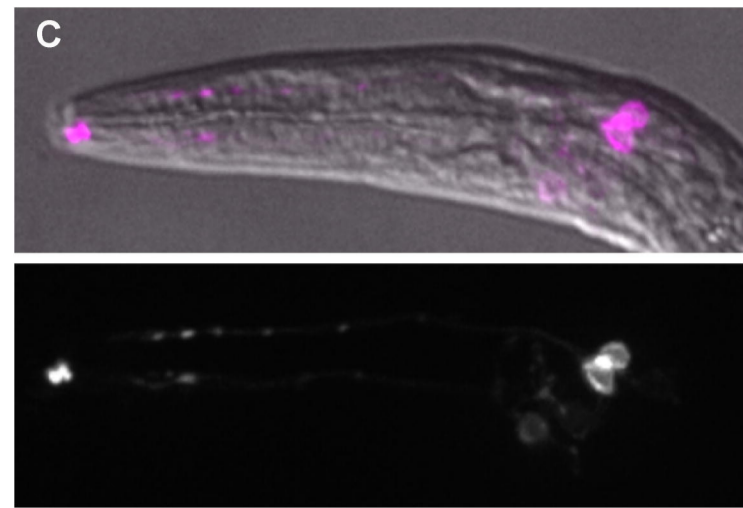

***air-2 (or207ts); Dil staining***  
**Shape & Position Defects**

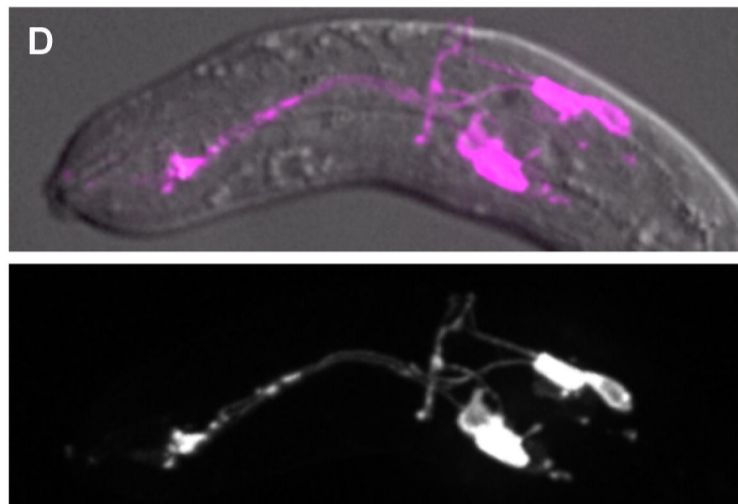

***air-2 (or207ts); Dil staining***  
**Diffused Dil Staining**

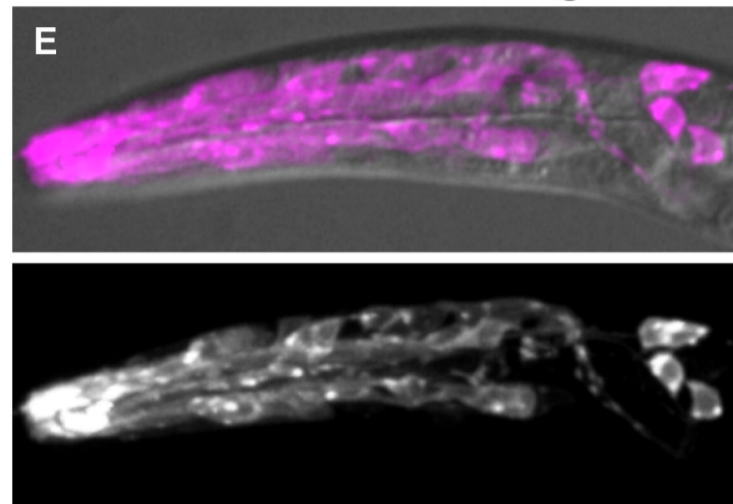

***zen-4 (or153ts); Dil staining***  
**No Dil Singal**

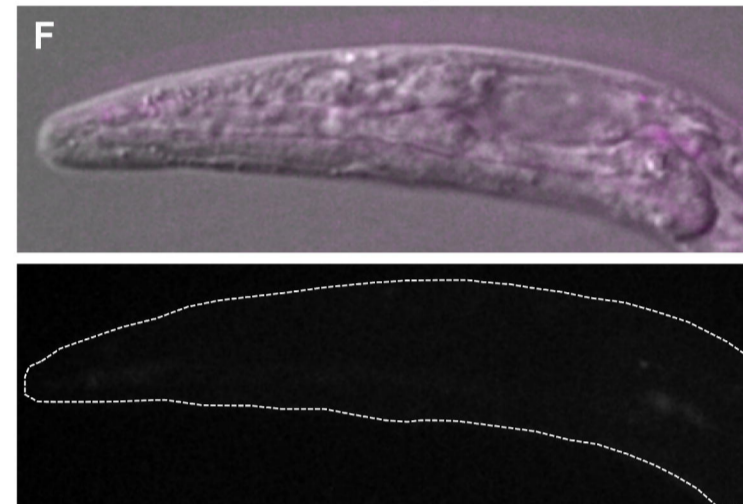

bioRxiv preprint doi: <https://doi.org/10.1101/319657>; this version posted May 15, 2018. The copyright holder for this preprint (which was not certified by peer review) is the author/funder, who has granted bioRxiv a license to display the preprint in perpetuity. It is made available under aCC-BY 4.0 International license.

***zen-4 (or153ts); Dil staining***  
**Weak Dil Singal**

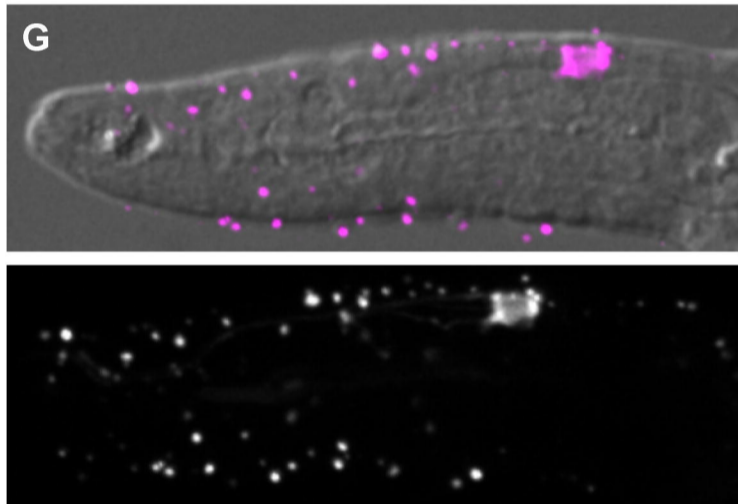

***zen-4 (or153ts); Dil staining***  
**Diffused Dil Staining**

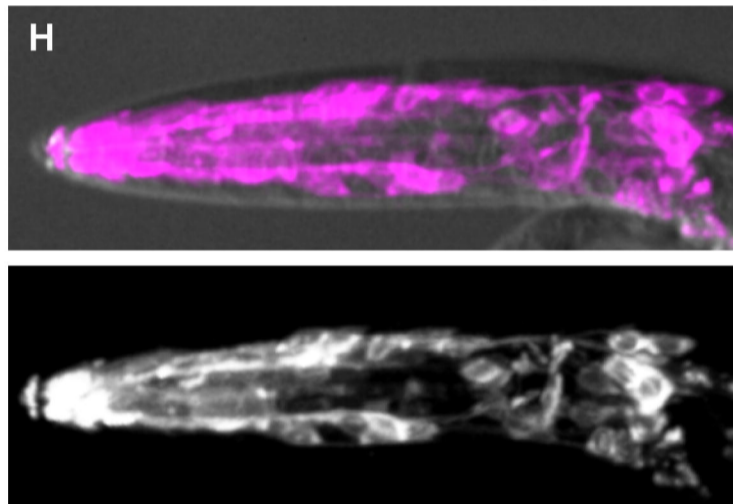

***spd-1 (oj5ts); Dil staining***  
**Diffused Dil Staining**

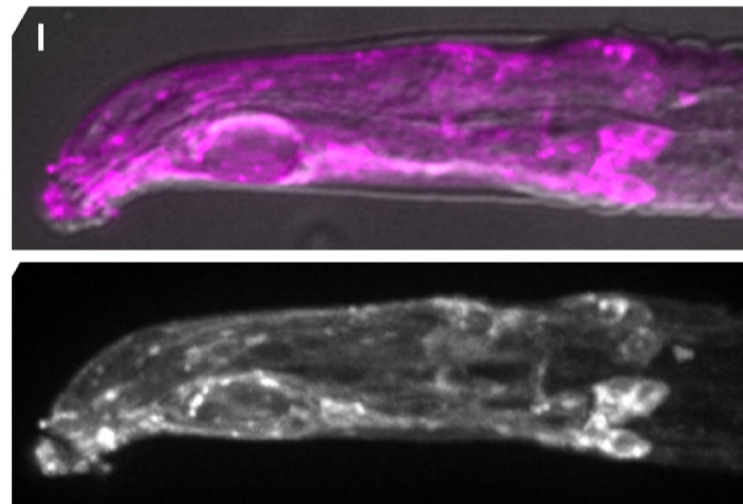

Source: https://www.biorxiv.org/content/10.1101/319657v2.full.pdf
